## Kinetic tracking of *Plasmodium falciparum* antigen presentation reveals determinants of protein export and membrane insertion

Short title: Malaria antigens RISE to the erythrocyte surface

Jinfeng Shao<sup>1</sup>, Gunjan Arora<sup>2</sup>, Javier Manzella-Lapeira<sup>2</sup>, Joseph A. Brzostowski<sup>2</sup>, and Sanjay A. Desai<sup>1,\*</sup>

<sup>1</sup>Laboratory of Malaria and Vector Research and <sup>2</sup>Laboratory of Immunogenetics, National Institute of Allergy and Infectious Diseases, National Institutes of Health, Rockville, MD, USA

\*Address correspondence to Sanjay A. Desai, [sdesai@niaid.nih.gov](mailto:sdesai@niaid.nih.gov)

## 1 **Abstract**

2 Intracellular malaria parasites export many proteins into their host cell, inserting several into the  
3 erythrocyte plasma membrane to enable interactions with their external environment. While  
4 static techniques have identified some surface-exposed proteins, other candidates have eluded  
5 definitive localization and membrane topology determination. Moreover, both export kinetics  
6 and the mechanisms of membrane insertion remain largely unexplored. We introduce Reporter  
7 of Insertion and Surface Exposure (RISE), a method for continuous nondestructive tracking of  
8 antigen exposure on infected cells. RISE utilizes a small 11 aa NanoLuc fragment inserted into a  
9 target protein and detects surface exposure through high-affinity complementation. We tracked  
10 insertion of CLAG3, a malaria parasite protein linked to nutrient uptake, throughout the *P.*  
11 *falciparum* cycle in human erythrocytes. Our approach also revealed key determinants of  
12 trafficking and surface exposure. Removal of a C-terminal transmembrane domain aborted  
13 export. Unexpectedly, certain increases in the exposed reporter size improved surface exposure  
14 by up to 50-fold, revealing that both size and charge of the extracellular epitope influence  
15 membrane insertion. Insertion of parasite proteins at the host cell surface and antigen  
16 accessibility is regulated by multiple factors, enabling intracellular parasite survival and immune  
17 evasion under a broad range of conditions.

## 18 **Introduction**

19 Many viral, bacterial and parasitic microbes invade, grow, and replicate within host cells to  
20 evade immune detection, access host cell machinery for replication, and use cellular  
21 macromolecules as nutrient sources [1]. At the same time, the intracellular milieu limits the  
22 pathogen from accessing plasma nutrients and often provides an inhospitable ionic composition  
23 or acidic pH. To overcome these hurdles, intracellular pathogens often export effector proteins  
24 into their host cell to remodel their abode, altering host cell defenses and physiology to their  
25 benefit [2–4]. A subset of effector proteins then insert in the host membrane to enable pathogen  
26 interactions with the extracellular space. These exposed proteins serve diverse roles and are  
27 acknowledged vaccine and drug targets.

28 In the virulent human malaria parasite *Plasmodium falciparum*, surface-exposed proteins  
29 benefit pathogen replication by facilitating cytoadherence [5], immune evasion [6] and nutrient  
30 uptake [7]. These antigens have been identified through static assays such as confocal and  
31 electron microscopy techniques. Because these methods lack the required spatial resolution [8],  
32 they cannot unambiguously determine if some parasite proteins are surface-exposed or only  
33 adherent to the inner membrane face or cytoskeleton. In some cases, susceptibility to  
34 extracellular proteases or antibody-based assays with live cells can resolve this uncertainty  
35 [9,10], but these approaches also have limitations. Another approach, mass spectrometry-based  
36 identification after surface labeling with NHS esters [11], has yielded a largely unvalidated list of  
37 proteins that is complicated by increased NHS ester permeability after infection with  
38 *Plasmodium* spp. [12].

39 Currently available methods also suffer from an inability to track the timing and kinetics of  
40 antigen insertion at the host membrane, hindering molecular insights. Both surface exposure via

41 fusion of exocytic vesicles and “punch-through” insertion of soluble protein into the host  
42 membrane have been proposed [13,14], but the absence of direct and quantitative measurements  
43 has prevented definitive mechanistic insights.

44 To address these limitations and better define how pathogen proteins insert at their host cell  
45 membrane, we developed and used a Reporter of Insertion and Surface Exposure (RISE). Our  
46 study combines RISE with biochemical studies of the target reporter protein to identify  
47 constraints on protein trafficking and membrane insertion.

48

## 49 **Results**

### 50 **HiBiT tagging within a conserved surface antigen in malaria parasites**

51 We sought to generate a sensitive kinetic reporter for protein insertion on infected cells and  
52 chose human erythrocytes infected with the virulent *P. falciparum* malaria parasite. Indirect  
53 immunofluorescence microscopy assays (IFA) with antibodies against exposed epitopes offer a  
54 specific readout but suffer from low spatial resolution and provide limited kinetic information  
55 about protein export and host membrane insertion. Split enzyme reporters can overcome these  
56 limitations when one enzyme fragment is introduced into the exported protein; a specific signal  
57 is produced through complementation with a second fragment added extracellularly. Similar  
58 location-specific complementation has been described using mammalian proteins [15], but this  
59 approach has not been used to track appearance of pathogen-derived antigens on host cells.  
60 Because it relies on extracellular interactions with a surface-exposed epitope, our strategy  
61 resembles antigen presentation on immune effector cells [16].

62 The bright NanoLuc luciferase is an ideal enzymatic reporter for bloodstage *P. falciparum*  
63 studies [17] and has recently been optimized for development of a split reporter [18]. We

64 selected the 11 residue HiBiT and 18 kDa LgBiT fragments of NanoLuc for our studies, based  
65 on their strong association ( $K_D = 700$  pM) that yields an ATP-independent, furimazine-sensitive  
66 luminescence signal.

67 We next reasoned that minimal modification of a normally exported parasite protein would  
68 be more informative about parasite biology than extensively engineered reporters, as used  
69 previously [19]. We preferred the parasite CLAG3 protein for these studies over antigens such as  
70 PfEMP1 and RIFINs encoded by large multigene families to avoid epigenetic regulation and  
71 variable expression [20]. *Clag* paralogs also undergo epigenetic silencing [21], but some clones  
72 carry a single constitutively expressed hybrid *clag3* gene termed *clag3h* [22]. One such line,  
73 KC5, has been successfully used for transfections without the risk of epigenetic silencing [23].  
74 CLAG3 is also the only known surface-exposed protein conserved in all examined *Plasmodium*  
75 spp. [24], suggesting that trafficking insights made using this protein may be broadly applicable.  
76 Because CLAG3 expression is linked to the plasmodial surface anion channel (PSAC), an ion  
77 and nutrient uptake channel at the host membrane [9], transport studies with transfectant parasites  
78 would also provide a biochemical correlate of reporter signal activity. We therefore selected  
79 CLAG3 for tagging and the KC5 clone for production of a surface exposure reporter parasite.

80 CLAG3 has a small 10-30 aa hypervariable region that appears to be exposed at the host  
81 membrane (HVR, Fig 1A) [25]. We therefore used CRISPR/Cas9 editing to replace the KC5  
82 *clag3h* HVR sequence with a single HiBiT tag flanked by 8 aa linker sequences; we named this  
83 limiting dilution clone *8-1* based on the size of the flanking linker and the number of inserted  
84 HiBiT tags (Fig 1A, bottom). HVR replacement increased the size of the extracellular loop  
85 domain by a modest 10 residues (S1A Fig). We also produced *8-IHA*, a similar line with an HA  
86 epitope tag added after the HiBiT linker cassette. Two additional lines, *8-Itrunc* and *8-*

87 *IHAtrunc*, express truncated CLAG3 reporters with a stop codon introduced after the inserted  
88 cassette (Fig 1A, bottom and S1A Fig). We initially reasoned that these truncation constructs  
89 would yield a more flexible extracellular HiBiT epitope and provide insights into roles served by  
90 the downstream CLAG3 sequence. Although CLAG3 is a critical determinant of PSAC activity,  
91 CLAG3 knockout parasites are viable [26], possibly because other CLAG paralogs in *P.*  
92 *falciparum* compensate for CLAG3 loss. Thus, we expected that our modifications would be  
93 tolerated unless they produce a dominant-negative effect on nutrient uptake [27].

94 Immunoblotting with each cloned transfectant confirmed expression and revealed single  
95 bands of expected size. Probing with anti-CLAG3 confirmed loss of this antibody's C-terminal  
96 epitope in the *8-Itrunc* clone and unchanged electrophoretic migration in *8-I* (Fig 1B, top). Both  
97 engineered CLAG3 isoforms were identified using a LgBiT probe that binds to HiBiT-tagged  
98 proteins to produce a luminescence signal (Fig 1B, bottom); the KC5 parent was not recognized  
99 by LgBiT, confirming specificity of this probe for the HiBiT tag. Similar results were obtained  
100 in the HA tandem-tagged parasites (Fig 1C), establishing faithful expression.

101 IFA confirmed and extended these findings. At the schizont stage, we detected each variant  
102 shortly after stage-specific synthesis under the genomic *clag3h* promoter (Fig 1D, upper group of  
103 images). While *8-I HA* parasites trafficked the modified CLAG3 protein normally to developing  
104 rhoptries, the truncated tagged protein in *8-IHAtrunc* produced a more diffuse pattern with a  
105 small fraction reaching the rhoptry to colocalize with RhopH3, an associated protein that also  
106 contributes to PSAC formation [28].

107 At merozoite egress and reinvasion, rhoptry proteins are secreted into the next erythrocyte  
108 and deposited into the parasitophorous vacuole [29]. From there, through an incompletely  
109 understood interaction with the PTEX translocon, CLAG3 is exported into host cytosol for

110 trafficking to the host membrane [28,30]. Imaging revealed that the tandem-tagged CLAG3  
111 protein in *8-IHA* trafficked as expected and colocalized with RhopH3 at the host cell surface  
112 (Fig 1D, lower group); an antibody specific for the CLAG3 c-terminus further confirmed this  
113 localization (S1B Fig). In contrast, the truncated CLAG3 in *8-IHAtrunc* parasites was less  
114 abundant, suggesting that its poor trafficking to rhoptries compromised delivery to the next  
115 erythrocyte upon reinvasion. The small pool of this protein delivered into trophozoites failed to  
116 be exported and did not colocalize with RhopH3 (Fig 1D, bottom row).

117 Stage-specific immunoblotting using *8-IHA* parasites revealed increases in CLAG3  
118 abundance upon parasite maturation to the schizont stage (Fig 1E), consistent with synthesis of  
119 this and other RhopH proteins predominantly in the late-stage parasites [31]. Ring and  
120 trophozoite parasites contained lower amounts that reflect incomplete transfer from prior cycle  
121 schizonts during egress and reinvasion [28]. The truncated protein in *8-IHAtrunc* was detected  
122 in schizonts but not in ring- and trophozoite-stage parasites, further implicating a role of the  
123 CLAG3 c-terminal region in efficient transfer to rhoptries and new erythrocytes during invasion.

124 We next used co-immunoprecipitation on anti-HA beads to examine protein-protein  
125 interactions for these CLAG3 reporter proteins (Fig 1F, silver-stained gel). CLAG3 was  
126 recovered from *8-IHA* and *8-IHAtrunc* lysates but not from negative control *8-1* and *8-1trunc*  
127 lines (bands labeled “1”), confirming specific pull-down. RhopH2 and RhopH3, unrelated  
128 proteins that interact with CLAG3 [24], were recovered from *8-IHA* (“2” and “3”), albeit with  
129 lower efficiency than in experiments using CLAG3-tv2, an engineered control parasite that a  
130 full-length CLAG3 with a C-terminal HA epitope tag (Fig 1A, ref # [30]). This reduced yield  
131 may result from compromised binding and recovery with an internal HA epitope tag when  
132 compared to the C-terminal tag in CLAG3-tv2. Co-immunoprecipitation using *8-IHAtrunc*

133 yielded an unchanged RhopH2 band and a smaller band as expected for truncated CLAG3, but  
134 RhopH3 was not detected in these silver-stained gels (Fig 1F). Immunoblotting confirmed  
135 recovery of RhopH3 in *8-IHA* pull-downs and failed interaction with RhopH3 upon CLAG3  
136 truncation (Fig 1G). The recent cryo-EM RhopH complex structure reveals that CLAG3  
137 interacts with RhopH3 via two primary domains termed the CLAG3 “300 region” and “1300  
138 loop” [30]. Because the 1300 loop is distal to the site of CLAG3 truncation in *8-IHAtrunc*,  
139 these findings suggest that this loop is required for stable CLAG3-RhopH3 interaction.

140

#### 141 **Kinetics of membrane insertion and surface exposure**

142 We next monitored stage-specific CLAG3 surface exposure on infected erythrocytes with the  
143 RISE method. We measured luminescence resulting from complementation of the HiBiT tag by  
144 extracellular LgBiT (Fig 2A). Bioluminescence microscopy revealed an undetectable reporter  
145 signal on immature ring-infected erythrocytes (Fig 2B, left panels) on KC5 and both HiBiT  
146 tagged lines, consistent with the appearance of PSAC activity on infected cells only after parasite  
147 maturation [32]. In contrast, trophozoite-infected cells exhibited a surface-distributed luciferase  
148 signal specific to *8-I* (Fig 2B-C). The *8-Itrunc* parasite matured normally but failed to produce  
149 a surface signal.

150 We then miniaturized this reporter assay into 96-well microplate wells and tracked CLAG3  
151 exposure kinetics in cultures initiated shortly after invasion. Although both clones exhibited  
152 negligible signals for the first 16 h of the parasite cycle, this lag was followed by a rapid increase  
153 in CLAG3 membrane insertion to produce luminescence on *8-I* (Fig 2D, red circles). This signal  
154 reached a plateau between 30 and 44 h on *8-I*, during which *8-Itrunc* parasites continued to  
155 produce minimal luminescence. At the end of the erythrocyte cycle (44-48 h), both transfectant  
156 cultures exhibited abruptly increased signals, consistent with merozoite egress and CLAG3



157 discharge into extracellular medium [31]. At the signal plateau, approximately 1/3 of the  
158 CLAG3 within *8-1* infected cells had become surface-exposed based on measured reporter signal  
159 before and after detergent release (Fig 2E, 36 h timepoint).

160 Prior studies of the CLAG3 HVR implicated exposure at the host cell surface based on this  
161 motif's susceptibility to extracellular protease [9,25]. We therefore examined whether the  
162 exposed HiBiT is also susceptible to external protease by measuring luminescence signals after a  
163 brief protease treatment of trophozoite infected cells. While the background signal in KC5  
164 parasites and the low-level signal from *8-Itrunc* cells were not significantly affected by  
165 extracellular protease treatment ( $P > 0.1$ ,  $n = 5$  independent trials each; Fig 2F), the large signal  
166 produced by *8-1* infected cells was reduced by  $39 \pm 3\%$  upon treatment with extracellular  
167 protease ( $P = 0.005$ ,  $n = 5$ ), further confirming that our split NanoLuc assay faithfully reports on  
168 CLAG3 exposure at the host cell surface.

169

### 170 **Failed export compromises channel-mediated permeability**

171 We next examined the effects of these CLAG3 modifications on nutrient uptake at the host  
172 membrane. We tracked uptake of sorbitol, a sugar alcohol with high PSAC permeability, and  
173 found that both the *8-1* and *8-Itrunc* parasites increase host cell permeability (Fig 3A), as  
174 expected from its requirement for intracellular pathogen survival [27,28]. Both *8-1* and *8-Itrunc*  
175 parasites exhibited lower sorbitol permeabilities than the parental KC5 (Fig 3B,  $P < 10^{-4}$ ,  $n = 20$ -  
176 21 trials each, one-way ANOVA with post-hoc tests), but uptake was preserved to a greater  
177 extent in *8-1*. The reduced permeability in *8-Itrunc* matched that of a recently reported CLAG3  
178 knockout, *C3h-KO* ( $P = 0.55$ ; ref # [26]), indicating that the truncated CLAG3 in this parasite

179 does not measurably contribute to PSAC activity. Failure to traffic and insert this protein in the  
180 host membrane conservatively accounts for this phenotype (Fig 2).

181 CLAG3 cleavage within the HVR by extracellular protease compromises solute transport  
182 [25]. Here, we found that pronase E treatment reduced channel-mediated transport in KC5 and  
183 *8-I*, but had no effect in *8-Itrunc* parasites (red traces, Fig 3A; Fig 3C,  $P < 10^{-4}$ ,  $n = 10-11$  trials,  
184 one way ANOVA with post-hoc tests), also consistent with intracellular retention of the  
185 truncated CLAG3 protein.

186 Immunoblots using an antibody directed against the CLAG3 C-terminus revealed single  $\sim 37$   
187 kDa cleavage products in KC5 and *8-I* (Fig 3D), corresponding to proteolysis at the surface-  
188 exposed HVR and release of the distal fragment. Cleaved band intensities revealed that these  
189 two parasites exported and inserted CLAG3 protein at the host membrane with indistinguishable  
190 efficacies (Fig 3D, bar graph). Because *8-Itrunc* parasites express a truncated CLAG3 not  
191 recognized by this antibody, we then probed these blots with LgBiT. This approach is based on  
192 visualization of HiBiT-tagged proteins via the luminescence generated upon LgBiT  
193 complementation. This treatment reduced the band intensity in protein from *8-I* parasites but had  
194 negligible effect on *8-Itrunc* CLAG3 (Fig 3E, bar graph), consistent with proteolytic  
195 degradation of an exposed HiBit tag only on *8-I* parasites.

196 These studies establish that CLAG3 must insert at the host membrane to contribute to PSAC  
197 activity because the truncated protein in *8-Itrunc* parasites has transport activity matching that of  
198 a CLAG3-null parasite. They also reveal that proteolysis at a surface-exposed loop on CLAG3  
199 compromises transport regardless of sequence as this site retained its susceptibility when  
200 replaced by a HiBiT reporter.

201

## 202 **Membrane insertion not compromised by increased extracellular loop size**

203 To examine possible constraints on insertion of the CLAG3 HVR at the host membrane, we  
204 generated an additional transfectant carrying a larger 3xHA epitope tag after the HiBiT cassette  
205 (S1C Fig). Biochemical studies with *8-IHA* and this new parasite, *8-I-3HA*, revealed marked  
206 increases in luminescence signals as the extracellular loop size increased by 9 and 27 residues,  
207 respectively. Using matched numbers of trophozoite-stage parasites, we found a 7- and 50-fold  
208 higher luminescence signals from the *8-IHA* and *8-I-3HA* parasites (Fig 4A, red bars) than from  
209 *8-I*. The increases in luminescence were more modest when measured after cell lysis with  
210 detergent (black bars). Greater accentuation with intact cells than after lysis is consistent with  
211 steric hindrance or constrained HiBiT presentation in a minimal extracellular loop, as proposed  
212 for CLAG3 [25]. Addition of these tags also significantly increased susceptibility of the HiBiT  
213 reporter to extracellular protease, with the larger 3xHA tag producing a greater reduction in  
214 luminescence upon protease treatment (Fig 4B). Membrane insertion and surface exposure were  
215 further confirmed with immunoblotting (Fig 4C) and luminescence imaging, which revealed  
216 dramatically increased signals from intact cells (Fig 4D). These findings suggest improved  
217 LgBiT binding and reporter complementation upon adjacent HA epitope tagging, presumably  
218 because the size and negative charge of this tag improves accessibility at the extracellular loop  
219 and within soluble RhopH complexes upon detergent release.

220 These larger insertions into CLAG3 had modest effects on channel-mediated sorbitol uptake  
221 at the host membrane (Fig 4E). The resulting channels also retained quantitatively similar  
222 protease susceptibilities (Fig 4F), consistent with minimally affected CLAG3 insertion and  
223 PSAC formation at the host membrane.

224

## 225 **Larger epitopes reveal complex regulation of CLAG3 membrane insertion**

226 To further explore size and charge constraints on pathogen epitope presentation, we made  
227 additional transfectants containing multiple HiBiT tags with two different linker sizes (Fig 5A).  
228 As these constructs retained upstream and distal CLAG3 sequences, each modified protein  
229 trafficked normally through schizonts and was delivered into maturing trophozoite-infected cells  
230 (S2A-B Fig), where the increased size of the targeted protein was apparent in immunoblots (Fig  
231 5B). Although immunofluorescence, sorbitol permeability measurements and protease  
232 susceptibility studies all suggested that CLAG3 failed to export and undergo host membrane  
233 insertion to enable PSAC activity in these lines (S2B Fig and Fig 5C), bioluminescence intensity  
234 analyses using RISE identified individual cells that presented CLAG3 on host cells (Fig 5D).  
235 Notably, while most cells in each of the largest multiple HiBiT constructs produced background  
236 signals, a few cells produced very bright signals that exceeded those seen on *8-1* parasites.  
237 These intense signals may reflect either reduced steric hindrance with larger, more flexible  
238 extracellular loops or signal amplification from HiBiT multiplicity on each protein. The  
239 markedly differing signals from individual cells is unexpected for these clonal lines. This  
240 observation suggests epigenetic control of CLAG3 export and host membrane insertion.

241 We tabulated the HVR sequences from 38 available CLAG3 sequences and compared their  
242 properties to those of the lines we have engineered. Although they are variant, the native HVR  
243 sequences tended to have a modest net negative charge (Fig 5E, black symbols). In contrast, the  
244 constructs containing more than one HiBit epitope were increasingly basic, yielding net positive  
245 charges on the at the extracellular loop (red symbols). Notably, the sequence in *8-1-3HA*, whose  
246 CLAG3 successfully inserted at the host membrane to produce remarkably bright luminescence  
247 using our RISE assays, had a higher molecular weight than that of *8-2*, which failed to traffic  
248 CLAG3 protein faithfully in most cells. It appears that the domain's net positive charge in *8-2*

249 and other multiple HiBit lines prevents trafficking and host membrane insertion. Along with  
250 structural constraints that ensure CLAG3-mediated nutrient uptake and evolutionary pressures to  
251 evade host immunity, the extracellular loop of this conserved protein family must also meet  
252 charge and size requirements for faithful trafficking and host membrane insertion.

253

## 254 **Discussion**

255 We present a new reporter that detects insertion of pathogen virulence antigens on their host  
256 cells. Our use of a split NanoLuc reporter is broadly applicable to a range of intracellular  
257 pathogens and will permit non-destructive kinetic tracking of antigens at the host cell surface.  
258 Some proteins targeted to underlying membranes, such as the parasitophorous vacuolar  
259 membrane of *Plasmodia*, *Toxoplasma*, and other parasites, may also be studied using selective  
260 permeabilization of the host membrane [33].

261 This reporter assay represents an important step toward understanding how pathogens  
262 interact with their host cells and will provide quantitative insights into the presentation of  
263 targeted antigens to the host immune system. We used this new technology to examine  
264 presentation of the conserved CLAG3 antigen on the surface of human erythrocytes. Associated  
265 nutrient channel transport, protein chemistry, and bioluminescence confocal microscopy studies  
266 all validated our new method.

267 Our findings implicate a revised model of CLAG3 trafficking. CLAG3 produced in  
268 schizonts remains inaccessible to extracellular LgBiT upon transfer to ring-infected cells; as the  
269 intracellular parasite matures, the protein is exported and inserts in the host membrane with  
270 kinetics that parallel the gradual appearance of the associated nutrient channel activity on  
271 trophozoite-infected cells. A C-terminal truncation that does not alter the reporter or its

272 upstream sequence compromised trafficking, abolished host membrane insertion, and reduced  
273 host cell permeability to levels seen in a recently reported CLAG3-null parasite. Using varied  
274 reporter insertions, we also uncovered complexities in this protein's insertion into the erythrocyte  
275 membrane; our studies suggest that both size and charge of the extracellular peptide loop  
276 determine host membrane insertion.

277 Our luminescence imaging studies revealed marked variation between cells in cloned  
278 multiple HiBit reporter lines, with some cells exhibiting high levels of CLAG3 exposure despite  
279 insertion of large reporter domains. This finding implicates an epigenetic, post-translational  
280 mechanism for regulating surface exposure. We propose that this may reflect altered expression  
281 of one or more parasite chaperone proteins in host cytosol [34] or post-translational  
282 modifications of CLAG3 [35,36]. Epigenetic control of antigen presentation on infected cells  
283 has, to our knowledge, not been proposed for any intracellular pathogens. This finding reveals  
284 the remarkable sophistication of malaria parasites in controlling their interactions with host  
285 plasma and further promotes immune evasion.

286 We envision that the quantitative and sensitive readout enabled by a small HiBiT epitope  
287 inserted at exposed antigen sites will unveil how pathogens modify their host cells while evading  
288 immune attack.

289

## 290 **Materials and Methods**

### 291 **Parasite cultivation and transfection**

292 The *P. falciparum* KC5 parasite clone and its engineered derivatives were cultivated in O+  
293 human erythrocytes (Interstate Blood Bank, Inc.) at 5% hematocrit in standard RPMI 1640-based  
294 media (KD medical) supplemented with supplemented with 25 mM HEPES, 50 µg/mL

295 hypoxanthine, 0.5% NZ Microbiological BSA (MP Biomedicals), gentamicin and 28.6 mM  
296 NaHCO<sub>3</sub> (Gibco) at 37 °C under 90% N<sub>2</sub>, 5% CO<sub>2</sub>, 5% O<sub>2</sub>.

297 CRISPR-Cas9 DNA transfection of parasites to produce reporter lines was performed using  
298 electroporation of pUF1-Cas9 and modified pL6 plasmids into uninfected erythrocytes as  
299 described previously [28]. Plasmids were constructed using synthetic double-stranded DNA  
300 (Integrated DNA Technologies) and In-Fusion cloning (Takara) into the pL6 plasmid. Single  
301 guide RNAs (sgRNA), selected using on-, off- and paralog specificity scores [37], were also  
302 introduced using In-Fusion. After erythrocyte electroporation and addition of schizont-staged  
303 parasites, the culture was selected with 1.5 μM DSM1 and 2.5 nM WR99210. After parasite  
304 outgrowth and PCR confirmation of integration, limiting dilution cloning was performed for all  
305 transfectant lines. All experiments were performed with sequence-verified clones.

306

### 307 **Immunoblotting**

308 Synchronous parasite cultures were harvested, percoll-enriched where indicated, and used for  
309 immunoblotting experiments after hypotonic lysis (7.5 mM Na<sub>2</sub>HPO<sub>4</sub>, 1 mM EDTA, 1 mM  
310 PMSF, pH 7.5) and solubilization in Laemmli sample buffer containing 6% SDS. When  
311 required, samples were matched with turbidity measurements at 700 nm. Proteins were  
312 separated by SDS-PAGE (4–15% Mini-PROTEAN TGX gel, Bio-RAD) and transferred to  
313 nitrocellulose membranes. After blocking with 3% skim milk powder in 150 mM NaCl, 20 mM  
314 TrisHCl, pH 7.4 with 0.1% Tween20 at RT for 1 h, primary antibodies were applied in the same  
315 blocking buffer at a 1:1000-1:3000 dilution and incubated overnight at 4 °C with gentle rocking.  
316 After three washes in 150 mM NaCl, 20 mM TrisHCl, pH 7.4 with 0.1% Tween20, HRP-  
317 conjugated secondary antibodies were added at 1:3000 dilution. The blot was incubated for 1 h

318 and washed three times. Imaging was performed after addition of Clarity Western ECL substrate  
319 (Bio-Rad) using the AI 680 imager (GE healthcare) or standard x-ray film exposure.

320 Where used, protease treatment was performed after washing and resuspending enriched  
321 trophozoite-infected cells in PBS-2 (150 mM NaCl, 20 mM Na<sub>2</sub>HPO<sub>4</sub>, 0.6 mM CaCl<sub>2</sub>, 1 mM  
322 MgCl<sub>2</sub>, pH 7.4) at 5% hematocrit with 1 mg/mL pronase E (Sigma) for 45-60 min at 37 °C. The  
323 treated cells and matched untreated cells were washed in PBS-2 with 1 mM PMSF at 4 °C before  
324 an additional wash in this buffer with 1 mM EDTA. After hypotonic lysis, the membrane  
325 fraction was harvested by ultracentrifugation (100,000 ×g, 1 h at 4 °C) and solubilized in  
326 Laemmli sample buffer as above.

327 Blots probed with LgBiT used the HiBiT blotting system kit (Promega). After protein  
328 transfer, nitrocellulose membranes were washed in 150 mM NaCl, 20 mM TrisHCl, pH 7.4 with  
329 0.1% Tween20. LgBiT was applied in this blotting buffer at 1:200 dilution and incubated  
330 overnight at 4 °C with gentle rocking. Furimazine was then added in blotting buffer at a 1:500  
331 dilution before imaging as above.

332 Band intensities were quantified using Image J software. Statistical analyses were based on  
333 three independent trials.

334

### 335 **Coimmunoprecipitation**

336 Schizont-stage infected cells were percoll-sorbitol enriched and lysed with 20 volumes of 10 mM  
337 Tris pH 7.5, 300 mM NaCl, 1% Triton-X100, 1 mM PMSF. After a 30 min incubation at 4 °C,  
338 solubilized proteins were separated by centrifugation (14,000 x g, 15 min, 4°C) and incubated  
339 with anti-HA affinity agarose beads (Sigma) with gentle mixing overnight at 4°C. After five  
340 washes, bound protein was eluted by addition of 2.5 mg/mL HA peptide in 10 mM Tris pH 7.5,



341 250 mM NaCl, 0.1% Triton-X100 for 30 min. Eluted proteins were resuspended in Laemmli  
342 sample buffer and subjected to SDS-PAGE.

343

#### 344 **Immunofluorescence assays**

345 Indirect immunofluorescence assays were performed using air-dried thin smears after fixation  
346 with 1:1 acetone:methanol at -20 °C for 2 min. Slides were then dried, blocked with 3% milk in  
347 PBS for 1 h at RT, and incubated with primary antibodies in blocking buffer (mouse anti-  
348 CLAG3, 1:100; rabbit anti-RhopH3, 1:500; mouse anti-HA, 1:100) for 1.5 h at RT under  
349 coverslips. After two washes with chilled PBS, Alexa Fluor 488 or 594-conjugated secondary  
350 antibody at a 1:500 dilution and 10 µg/mL DAPI were added in blocking buffer and incubated  
351 for 30 min at RT. After washes and drying, slides were mounted with Prolong Diamond anti-  
352 fade mountant (Molecular Probes). Images were collected on a Leica SP8 microscope using a  
353 64x oil immersion objective with serial 405 nm, 488 nm, or 594 nm excitation. Images were  
354 processed using Leica LAS X and Huygens software.

355

#### 356 **Enrichment of ring-infected cells**

357 Ring-stage cultures were further synchronized by a 20 min incubation in 4% xylitol, a sugar  
358 alcohol with high PSAC permeability [38], to lyse mature infected cells. The culture was then  
359 resuspended and incubated in culture medium supplemented with 207 mM xylitol for 1 h at 37  
360 °C. This cell suspension was then layered on a discontinuous percoll-xylitol gradient a bottom  
361 layer of 72% Percoll and an upper layer of 40% Percoll; both solutions were prepared in RPMI  
362 1640 medium with 208 mM xylitol, 12.4 mM HEPES, and 16.3 mg/L BSA. After centrifugation

363 (10,000 x g for 30 min at 21 °C), ring-stage infected cells at 65-90% parasitemia were harvested  
364 and washed by dropwise addition of culture medium.

365

### 366 **Luminescence measurements and export kinetics**

367 Luminescence measurements were performed using percoll-enriched infected erythrocytes in  
368 384 well microplates using the Nano-Glo HiBiT extracellular detection system (Promega). Cells  
369 were resuspended at 0.2% hematocrit in culture medium diluted with two volumes of 200:1:50  
370 buffer:LgBiT:Furimazine, according to the manufacture's protocol. After a 30 min RT  
371 incubation, luminescence was measured using the Centro XS3 LB 960 reader (Berthold) or  
372 Synergy Neo2 (BioTek) with a counting time of 0.5 s/well.

373 CLAG3 export kinetics were tracked using luminescence after seeding enriched ring-infected  
374 cells in culture medium at 0.5% hematocrit into triplicate wells at 60 µL/well. The plates were  
375 sealed with Breathe-Easy sealing membrane (RPI) and incubated at 37 °C under 5% CO<sub>2</sub> in air.  
376 At timed intervals, 40 µL of medium from selected wells was replaced with Nano-Glo HiBiT  
377 extracellular buffer with LgBiT and furimazine substrate (Promega). Readings were taken after  
378 a 30 min room temperature incubation as described above.

379

### 380 **Bioluminescence microscopy**

381 Erythrocytes infected with reporter parasite clones were imaged using a LV200 inverted  
382 bioluminescence microscope with a temperature-controlled stage (Olympus). Enriched ring- or  
383 trophozoite-infected erythrocytes were resuspended in culture medium at 2.5% hematocrit before  
384 diluting 50x into Nano-Glo HiBiT extracellular buffer (Promega) with LgBiT and furimazine at  
385 100x and 50x dilutions, respectively for a total volume of 100 µL in a 35 mm poly-D-lysine

386 coated coverslip dish (MatTek). Cells were allowed to settle at 37 °C for 25 min in the LV200  
387 microscope before selecting fields of view for imaging. Bioluminescence images were collected  
388 with a 45 min exposure under a 64x oil immersion objective. Images were visualized and  
389 adjusted to 14 bit in LCmicro\_2.2 software (Olympus).

390 Single cell luminescence intensities were quantified using a locally-developed macro that  
391 uses the corresponding brightfield image to define the cell boundary. This macro reports  
392 luminescence intensities over the cell, tabulating mean, max and min values along with the cell  
393 2D area and is available upon request.

394

#### 395 **Osmotic lysis assays**

396 The kinetics of PSAC-mediated sorbitol uptake and infected cell osmotic lysis were continuously  
397 tracked as described previously [26]. Enriched trophozoite-stage infected cells were washed and  
398 resuspended in 150 mM NaCl, 20 mM Na-HEPES buffer, 0.1 mg/mL BSA, pH 7.4. Solute  
399 uptake was initiated by the addition of 280 mM sorbitol, 20 mM Na-HEPES, 0.1 mg/mL BSA,  
400 pH 7.4. Concomitant uptake of sorbitol and water produces osmotic lysis at rates directly  
401 proportional to PSAC sorbitol permeability. Lysis kinetics were continuously monitored using  
402 transmittance of 700 nm light through the cell suspension. Osmotic lysis half-times, normalized  
403 permeability estimates, and measures of protease effect were determined from the recordings  
404 with locally developed code.

405

#### 406 **Computational and statistical analyses**

407 CLAG3 sequences were downloaded from [www.plasmodb.org](http://www.plasmodb.org) and aligned using Multiple  
408 Sequence Alignment (MUSCLE) to identify HVR sequences from available *P. falciparum*

409 paralogs. The molecular weight and net charge at pH 7.4 was calculated at

410 <http://protcalc.sourceforge.net/>.

411 Numerical data are shown as mean  $\pm$  S.E.M. Data were analyzed in SigmaPlot 10.0 (Systat)

412 or Prism 8 (GraphPad). Statistical significance was determined using unpaired or paired

413 Student's *t*-test or one-way ANOVA with *post hoc* Tukey's multiple comparisons test as

414 appropriate. Significance was accepted at  $P < 0.05\%$ .

415

416

417

418

## 419 **Acknowledgements**

420 We thank Gagan Saggi for help with immunofluorescence assays and David Jacobus for

421 WR99210. DSM1 (MRA-1161) was obtained through MR4 as part of the BEI Resources

422 Repository, NIAID, NIH.

423

424 **Author contributions**

425 **Conceptualization:** Jinfeng Shao, Sanjay A. Desai.

426 **Data curation:** Jinfeng Shao, Gunjan Arora, Javier Manzella-Lapeira, Joseph A. Brzostowski,  
427 Sanjay A. Desai.

428 **Formal analysis:** Jinfeng Shao, Gunjan Arora, Javier Manzella-Lapeira, Joseph A. Brzostowski,  
429 Sanjay A. Desai.

430 **Investigation:** Jinfeng Shao, Gunjan Arora, Javier Manzella-Lapeira.

431 **Supervision:** Sanjay A. Desai.

432 **Writing – original draft:** Jinfeng Shao, Sanjay A. Desai.

433 **Writing – review & editing:** Jinfeng Shao, Gunjan Arora, Javier Manzella-Lapeira, Joseph A.  
434 Brzostowski, Sanjay A. Desai.

435

436 **Competing interests**

437 The authors declare no competing interests.

## 438 References

- 439 1. Thakur A, Mikkelsen H, Jungersen G. Intracellular pathogens: host immunity and  
440 microbial persistence strategies. *J Immunol Res.* 2019; 2019:1356540. PMID: 31111075
- 441 2. Cornejo E, Schlaermann P, Mukherjee S. How to rewire the host cell: a home improvement  
442 guide for intracellular bacteria. *J Cell Biol.* 2017; 216: 3931-48. PMID: 29097627
- 443 3. Marti M, Baum J, Rug M, Tilley L, Cowman AF. Signal-mediated export of proteins from  
444 the malaria parasite to the host erythrocyte. *J Cell Biol.* 2005; 171: 587-92. PMID:  
445 16301328
- 446 4. Laliberte J, Carruthers VB. Host cell manipulation by the human pathogen *Toxoplasma*  
447 *gondii*. *Cell Mol Life Sci.* 2008; 65: 1900-15. PMID: 18327664
- 448 5. Lee WC, Russell B, Renia L. Sticking for a cause: The falciparum malaria parasites  
449 cytoadherence paradigm. *Front Immunol.* 2019; 10:1444. PMID: 31316507
- 450 6. Yam XY, Preiser PR. Host immune evasion strategies of malaria blood stage parasite. *Mol*  
451 *Biosyst.* 2017; 13: 2498-508. PMID: 29091093
- 452 7. Desai SA. Why do malaria parasites increase host erythrocyte permeability? *Trends*  
453 *Parasitol.* 2014; 30: 151-9. PMID: 24507014
- 454 8. Mayhew TM, Lucocq JM. Developments in cell biology for quantitative immunoelectron  
455 microscopy based on thin sections: a review. *Histochem Cell Biol.* 2008; 130: 299-313.  
456 PMID: 18553098
- 457 9. Nguitrage W, Bokhari AA, Pillai AD, Rayavara K, Sharma P, Turpin B et al. Malaria  
458 parasite *clag3* genes determine channel-mediated nutrient uptake by infected red blood  
459 cells. *Cell* 2011; 145: 665-77. PMID: 21620134
- 460 10. Jouin H, Goguet de la Salmoniere YO, Behr C, Huyin Qan DM, Michel JC, Sarthou JL et  
461 al. Flow cytometry detection of surface antigens on fresh, unfixed red blood cells infected  
462 by *Plasmodium falciparum*. *J Immunol Methods.* 1995; 179: 1-12. PMID: 7868917
- 463 11. Florens L, Liu X, Wang Y, Yang S, Schwartz O, Peglar M et al. Proteomics approach  
464 reveals novel proteins on the surface of malaria-infected erythrocytes. *Mol Biochem*  
465 *Parasitol.* 2004; 135: 1-11. PMID: 15287581
- 466 12. Cohn JV, Alkhalil A, Wagner MA, Rajapandi T, Desai SA. Extracellular lysines on the  
467 plasmodial surface anion channel involved in Na<sup>+</sup> exclusion. *Mol Biochem Parasitol.* 2003;  
468 132: 27-34. PMID: 14563534
- 469 13. Taraschi TF, Trelka D, Martinez S, Schneider T, O'Donnell ME. Vesicle-mediated  
470 trafficking of parasite proteins to the host cell cytosol and erythrocyte surface membrane in  
471 *Plasmodium falciparum* infected erythrocytes. *Int J Parasitol.* 2001; 31: 1381-91. PMID:  
472 11566305

- 473 14. Papakrivovs J, Newbold CI, Lingelbach K. A potential novel mechanism for the insertion of  
474 a membrane protein revealed by a biochemical analysis of the *Plasmodium falciparum*  
475 cytoadherence molecule PfEMP-1. Mol Microbiol. 2005; 55: 1272-84. PMID: 15686570
- 476 15. Wehrman TS, Casipit CL, Gewertz NM, Blau HM. Enzymatic detection of protein  
477 translocation. Nat Methods. 2005; 2: 521-7. PMID: 15973423
- 478 16. Joffre OP, Segura E, Savina A, Amigorena S. Cross-presentation by dendritic cells. Nat  
479 Rev Immunol. 2012; 12: 557-69. PMID: 22790179
- 480 17. Azevedo MF, Nie CQ, Elsworth B, Charnaud SC, Sanders PR, Crabb BS et al. *Plasmodium*  
481 *falciparum* transfected with ultra bright NanoLuc luciferase offers high sensitivity  
482 detection for the screening of growth and cellular trafficking inhibitors. PLoS One. 2014; 9:  
483 e112571. PMID: 25392998
- 484 18. Dixon AS, Schwinn MK, Hall MP, Zimmerman K, Otto P, Lubben TH et al. NanoLuc  
485 complementation reporter optimized for accurate measurement of protein interactions in  
486 cells. ACS Chem Biol. 2016; 11: 400-8. PMID: 26569370
- 487 19. Knuepfer E, Rug M, Klonis N, Tilley L, Cowman AF. Trafficking of the major virulence  
488 factor to the surface of transfected *P. falciparum*-infected erythrocytes. Blood. 2005; 105:  
489 4078-87. PMID: 15692070
- 490 20. Llorca-Battle O, Tinto-Font E, Cortes A. Transcriptional variation in malaria parasites: why  
491 and how. Brief Funct Genomics. 2019; 18: 329-41. PMID: 31114839
- 492 21. Cortes A, Carret C, Kaneko O, Yim Lim BY, Ivens A, Holder AA. Epigenetic silencing of  
493 *Plasmodium falciparum* genes linked to erythrocyte invasion. PLoS Pathog. 2007; 3: e107.  
494 PMID:17676953
- 495 22. Iriko H, Kaneko O, Otsuki H, Tsuboi T, Su XZ, Tanabe K et al. Diversity and evolution of  
496 the *rhoph1/clag* multigene family of *Plasmodium falciparum*. Mol Biochem Parasitol.  
497 2008; 158(1): 11-21. PMID: 18155305
- 498 23. Gupta A, Balabaskaran-Nina P, Nguitragool W, Saggu GS, Schureck MA, Desai SA.  
499 CLAG3 self-associates in malaria parasites and quantitatively determines nutrient uptake  
500 channels at the host membrane. mBio. 2018; 9: e02293-17. PMID: 29739907
- 501 24. Gupta A, Thiruvengadam G, Desai SA. The conserved *clag* multigene family of malaria  
502 parasites: essential roles in host-pathogen interaction. Drug Resist Updat. 2015; 18:47-54.  
503 PMID: 25467627
- 504 25. Nguitragool W, Rayavara K, Desai SA. Proteolysis at a specific extracellular residue  
505 implicates integral membrane CLAG3 in malaria parasite nutrient channels. PLoS One  
506 2014; 9: e93759. PMID: 24699906

- 507 26. Gupta A, Bokhari AAB, Pillai AD, Crater AK, Gezelle J, Saggu G et al. Complex nutrient  
508 channel phenotypes despite Mendelian inheritance in a *Plasmodium falciparum* genetic  
509 cross. PLoS Pathog. 2020; 16: e1008363. PMID: 32069335
- 510 27. Pillai AD, Nguitrageol W, Lyko B, Dolinta K, Butler MM, Nguyen ST et al. Solute  
511 restriction reveals an essential role for *clag3*-associated channels in malaria parasite  
512 nutrient acquisition. Mol Pharmacol. 2012; 82: 1104-14. PMID: [22949525](#)
- 513 28. Ito D, Schureck MA, Desai SA. An essential dual-function complex mediates erythrocyte  
514 invasion and channel-mediated nutrient uptake in malaria parasites. Elife. 2017; 6:e23485.  
515 PMID: 28221136
- 516 29. Ben CR, Lentini G, Soldati-Favre D. Biogenesis and discharge of the rhoptries: Key  
517 organelles for entry and hijack of host cells by the Apicomplexa. Mol Microbiol. 2021;  
518 115: 453-65. PMID: 33368727
- 519 30. Schureck MA, Darling JE, Merk A, Shao J, Daggupati G, Srinivasan P et al. Malaria  
520 parasites use a soluble RhopH complex for erythrocyte invasion and an integral form for  
521 nutrient uptake. Elife 2021; 10: e65282. PMID: 33393463
- 522 31. Ling IT, Florens L, Dluzewski AR, Kaneko O, Grainger M, Yim Lim BY et al. The  
523 *Plasmodium falciparum clag9* gene encodes a rhoptry protein that is transferred to the host  
524 erythrocyte upon invasion. Mol Microbiol. 2004; 52: 107-18. PMID: 15049814
- 525 32. Kutner S, Baruch D, Ginsburg H, Cabantchik ZI. Alterations in membrane permeability of  
526 malaria-infected human erythrocytes are related to the growth stage of the parasite.  
527 Biochim Biophys Acta. 1982; 687: 113-7. PMID: 0007041976
- 528 33. Jackson KE, Spielmann T, Hanssen E, Adisa A, Separovic F, Dixon MW et al. Selective  
529 permeabilization of the host cell membrane of *Plasmodium falciparum*-infected red blood  
530 cells with streptolysin O and equinatoxin II. Biochem J. 2007; 403: 167-75. PMID:  
531 17155936
- 532 34. Zhang Q, Ma C, Oberli A, Zinz A, Engels S, Przyborski JM. Proteomic analysis of  
533 exported chaperone/co-chaperone complexes of *P. falciparum* reveals an array of complex  
534 protein-protein interactions. Sci Rep. 2017; 7:42188. PMID: 28218284
- 535 35. Cobbold SA, Santos JM, Ochoa A, Perlman DH, Llinas M. Proteome-wide analysis reveals  
536 widespread lysine acetylation of major protein complexes in the malaria parasite. Sci Rep.  
537 2016; 6:19722. PMID: 26813983
- 538 36. Pease BN, Huttlin EL, Jedrychowski MP, Talevich E, Harmon J, Dillman T et al. Global  
539 analysis of protein expression and phosphorylation of three stages of *Plasmodium*  
540 *falciparum* intraerythrocytic development. J Proteome Res. 2013; 12: 4028-45. PMID:  
541 23914800



- 542 37. Ribeiro JM, Garriga M, Potchen N, Crater AK, Gupta A, Ito D et al. Guide RNA selection  
543 for CRISPR-Cas9 transfections in *Plasmodium falciparum*. Int J Parasitol. 2018; 48:825-  
544 32. PMID: 29906414
- 545 38. Bokhari AA, Solomon T, Desai SA. Two distinct mechanisms of transport through the  
546 plasmodial surface anion channel. J Membr Biol. 2008; 226: 27-34. PMID: 19050955
- 547

## 548 **Figure Legends**

549 **Fig. 1. Design and production of host membrane-exposed split-reporter antigens. (A)**  
550 Schematic shows native and modified CLAG3 topology at the host erythrocyte surface (left and  
551 right top images, respectively). The native HVR sequence is replaced by varied HiBiT reporter  
552 cassettes. Engineered lines are shown with ribbon diagrams at the bottom. **(B)** Immunoblots of  
553 matched total cell lysates from indicated lines, probed with antibody against a C-terminal  
554 CLAG3 epitope (top) or with LgBiT (bottom). *8-Itrunc* is recognized by LgBiT but not by anti-  
555 CLAG3. **(C)** Immunoblots showing recognition of HA-tagged lines with anti-HA and LgBiT.  
556 **(D)** Indirect immunofluorescence assays (IFA) of indicated proteins in wild-type (WT) and  
557 transfected lines. In schizonts (top panels), CLAG3 colocalizes with RhopH3 in apical rhoptries  
558 (puncta) in *8-IHA*, but has a more diffuse distribution in *8-IHAtrunc*. IFA with trophozoite-  
559 stage parasites (bottom panels) reveals normal export of CLAG3 and colocalization with  
560 RhopH3 at the host membrane in *8-IHA* but a reduced signal with failed export in *8-IHAtrunc*.  
561 Scale bars, 5  $\mu$ m. **(E)** Immunoblots showing stage-specific CLAG3 abundance in indicated  
562 lines (top row, probed with LgBiT). The truncated protein in *8-IHAtrunc* is detected in  
563 schizonts (S) but not rings or trophozoites (R and T). Bottom row, aldolase loading control. **(F)**  
564 Silver-stained gel showing co-immunoprecipitation using anti-HA beads and indicated parasite  
565 lysates. WT, *8-I*, and *8-Itrunc* represent no-HA negative controls. Yellow 1, 2, and 3 labels  
566 indicate CLAG3, RhopH2, and RhopH3, respectively. **(G)** Immunoblots using eluates from  
567 panel F, probed with anti-RhopH3 and anti-HA for the CLAG3 bait protein.

568

569 **Fig. 2. Faithful tracking of host membrane insertion. (A)** Schematic showing parasite  
570 developmental stages and host membrane insertion-dependent luminescence. After invasion, the  
571 tagged CLAG3 protein is deposited into the parasitophorous vacuole before export and eventual

572 insertion at the host membrane. Interaction between extracellular LgBiT and the surface-  
573 exposed HiBiT tag on *8-I* yields luminescence at mature parasite stages (purple glow). **(B)**  
574 Bioluminescence microscopy images showing undetectable signals on immature ring-infected  
575 cells (left panels), but a bright luminescence signal on *8-I* infected cells at the trophozoite stage  
576 (right panels). KC5 and *8-Itrunc* parasites yield negligible signals. Scale bars, 10  $\mu\text{m}$ . **(C)**  
577 “Zoom in” of a single *8-I* infected cell from panel **B**, showing surface distribution of  
578 luminescence signal. Scale bar, 2  $\mu\text{m}$ . **(D)** Luminescence kinetics over parasite development,  
579 showing CLAG3 membrane insertion in *8-I* but not *8-Itrunc* (red and black symbols,  
580 respectively; mean  $\pm$  S.E.M. of 3 replicate wells, representative of 3 independent trials).  
581 Enriched synchronized early ring-infected cells seeded at  $t = 0$ . Increased signals at 48 h in both  
582 parasites reflect parasite egress and release of intracellular reporter protein. **(E)** Mean  $\pm$  S.E.M.  
583 CLAG3 exposure on indicated lines at 36 h (\*,  $P = 0.03$ ,  $n = 3$  trials), calculated as the  
584 luminescence signal normalized to total signal after cell lysis. **(F)** Mean  $\pm$  S.E.M. luminescence  
585 signals from enriched trophozoite-infected cells without and with extracellular protease treatment  
586 (black and red bars, respectively; \*,  $P = 0.005$ ,  $n = 5$ ).

587

588 **Fig. 3. Modest effect of the reporter tag on CLAG3 export and on channel-mediated**  
589 **nutrient uptake. (A)** Kinetics of osmotic lysis due to sorbitol uptake by indicated lines without  
590 or with pretreatment with pronase E (black and red traces, respectively). **(B)** Apparent sorbitol  
591 permeability coefficients from experiments as in panel A without protease treatment, calculated  
592 as  $1/\text{halftime}$  of osmotic lysis. \*,  $P < 10^{-4}$ . **(C)** Pronase E-resistant transport activity for  
593 indicated lines, normalized to 100% for matched untreated controls. \*,  $P < 10^{-4}$ . **(D)** Anti-  
594 CLAG3 immunoblot showing a 37 kDa C-terminal cleavage product released by pronase E

595 treatment. Bar graph shows quantified fractional band intensity of the cleavage product (mean  $\pm$   
596 S.E.M. 2 independent trials). **(E)** Blot probed with LgBiT showing reduction in the 150 kDa  
597 full length CLAG3 protein upon protease treatment. Bar graph, band intensities after protease  
598 treatment, normalized to 100% without protease (2 independent trials).

599

600 **Fig. 4. Addition of HA and 3xHA tags improve reporter signal and does not compromise**  
601 **host membrane insertion.** **(A)** Mean  $\pm$  S.E.M. luminescence signals from indicated parasite  
602 clones using matched amounts of enriched trophozoite-infected cells. Red and black bars  
603 represent intact and lysed cells, respectively (\*,  $P = 10^{-4}$ , one-way ANOVA,  $n = 3$  independent  
604 trials). Signals are shown after normalization of *8-I* readings to 1.0 in each trial. Immunoblot  
605 shows representative loading control for matching protein contents from one of the three trials.  
606 **(B)** Mean  $\pm$  S.E.M. luminescence signals remaining after extracellular protease treatment of  
607 intact cells from indicated lines, normalized to 100% for no protease effect (\*,  $P = 0.0002$ ,  $n = 3$ -  
608 6 for each clone). **(C)** Anti-CLAG3 immunoblot showing C-terminal cleavage product released  
609 by extracellular pronase E treatment. **(D)** Bioluminescence microscopy showing increased  
610 signals from individual cells when 1HA and 3HA tags are added to the HiBit reporter. Scale  
611 bars, 5  $\mu\text{m}$ . **(E)** Mean  $\pm$  S.E.M. sorbitol permeabilities for indicated parasites, determined from  
612 osmotic lysis experiments ( $n = 5$ -21 trials each). **(F)** % of transport resistant to treatment with  
613 extracellular pronase E ( $n = 4$ -11 trials). Channel-mediated transport is modestly affected in  
614 these lines.

615

616 **Fig. 5. Large reporter inserts reveal complex regulation of CLAG3 insertion at the host**  
617 **membrane.** **(A)** To-scale schematic showing multi-HiBiT inserts and sizes of linkers between

618 elements. The parasite names reflect the predominant linker size (in residues) followed by the  
619 number of introduced HiBiTs. **(B)** Anti-CLAG3 immunoblot confirming the expected increase  
620 in CLAG3 size with each construct. **(C)** PSAC activity in transfected clones. Top left, osmotic  
621 lysis kinetics for the KC5 parent (black), *8-1* (red), *8-2* (blue), and *8-1trunc* (grey). Right, mean  
622  $\pm$  S.E.M. apparent sorbitol permeability coefficients for indicated lines; red dotted line, mean for  
623 the *C3h-KO* knockout line. Note that all multi-HiBiT inserts have permeabilities  
624 indistinguishable from those of the CLAG3 knockout. Bottom left, *8-2* osmotic lysis kinetics  
625 with and without protease treatment (red and black, respectively), showing that transport is not  
626 protease sensitive in this line. Bottom right, mean  $\pm$  S.E.M. % of transport resistant to  
627 extracellular pronase E treatment. In contrast to the CLAG3 export competent KC5 and *8-1*  
628 lines, transport linked to the multi-HiBiT inserts is resistant to extracellular pronase. **(D)**  
629 Microscopy images showing rare luminescent cells in the *8-5* reporter line. Jitter plot shows  
630 single cell intensities of indicated lines. Break points were selected based on the range of  
631 intensities in the KC5 and *8-1* controls. Note that while most cells are negative in the multi-  
632 HiBiT constructs, a small number have very high signals in each reporter line. **(E)** 2D plot  
633 showing molecular weight (MW) and net charge at pH 7.4 for the CLAG3 HVR region from 38  
634 available sequences (black circles) and the indicated engineered substitutions (red symbols).

635

## 636 **Supporting Figure Legends**

637 **S1 Fig. Construction and validation of reporter protein for host membrane insertion. (A)**

638 Sequences of the modified CLAG3 locus in *8-1* and *8-IHA* reporter lines aligned with the  
639 parental KC5 CLAG3h and CLAG3.1 and CLAG3.2 from divergent *P. falciparum* lines (7G8  
640 and Dd2 from Brazil and Indochina, respectively). The HVR sequences from wild-type lines is

641 highlighted in grey; introduced HiBiT is shown with magenta highlight. HA tag is underlined;  
642 the sites where stop codons were introduced to produce *8-Itrunc* and *8-IHAtrunc* are marked  
643 with red arrows. Identical and conserved residues that flank the HVR are in red and blue,  
644 respectively. Note the length polymorphism in native HVR sequences; the modification to  
645 produce *8-IHA* increases the length of this extracellular motif. **(B)** IFA of trophozoite-stage  
646 parasites probed with a CLAG3-specific antibody directed against a C-terminal epitope [9].  
647 Scale bar, 5  $\mu$ m. Notice unchanged export and colocalization with RhopH3 in *8-I* and *8-IHA*  
648 parasites. **(C)** Modified CLAG3 locus sequence in the *8-I-3HA* parasite with color-coding as in  
649 panel **A**. The 3xHA tag is underlined.

650

651 **S2 Fig. Trafficking and membrane insertion for large multi-HiBiT insertions into the**  
652 **CLAG3 HVR.** IFA micrographs of indicated lines at the schizont and trophozoite stages (panels  
653 **A** and **B**, respectively), showing that each construct is faithfully trafficked to rhoptry organelles  
654 in schizonts, but that the multi-HiBiT lines do not export CLAG3 to the host membrane of most  
655 trophozoite-infected cells. Scale bars, 5  $\mu$ m. **(C)** Anti-CLAG3 immunoblot showing that  
656 chymotrypsin releases a ~ 35 kDa cleavage product in KC5 and *8-I* parasites, but that cleavage  
657 is not detected in studies with the indicated multi-HiBiT lines.

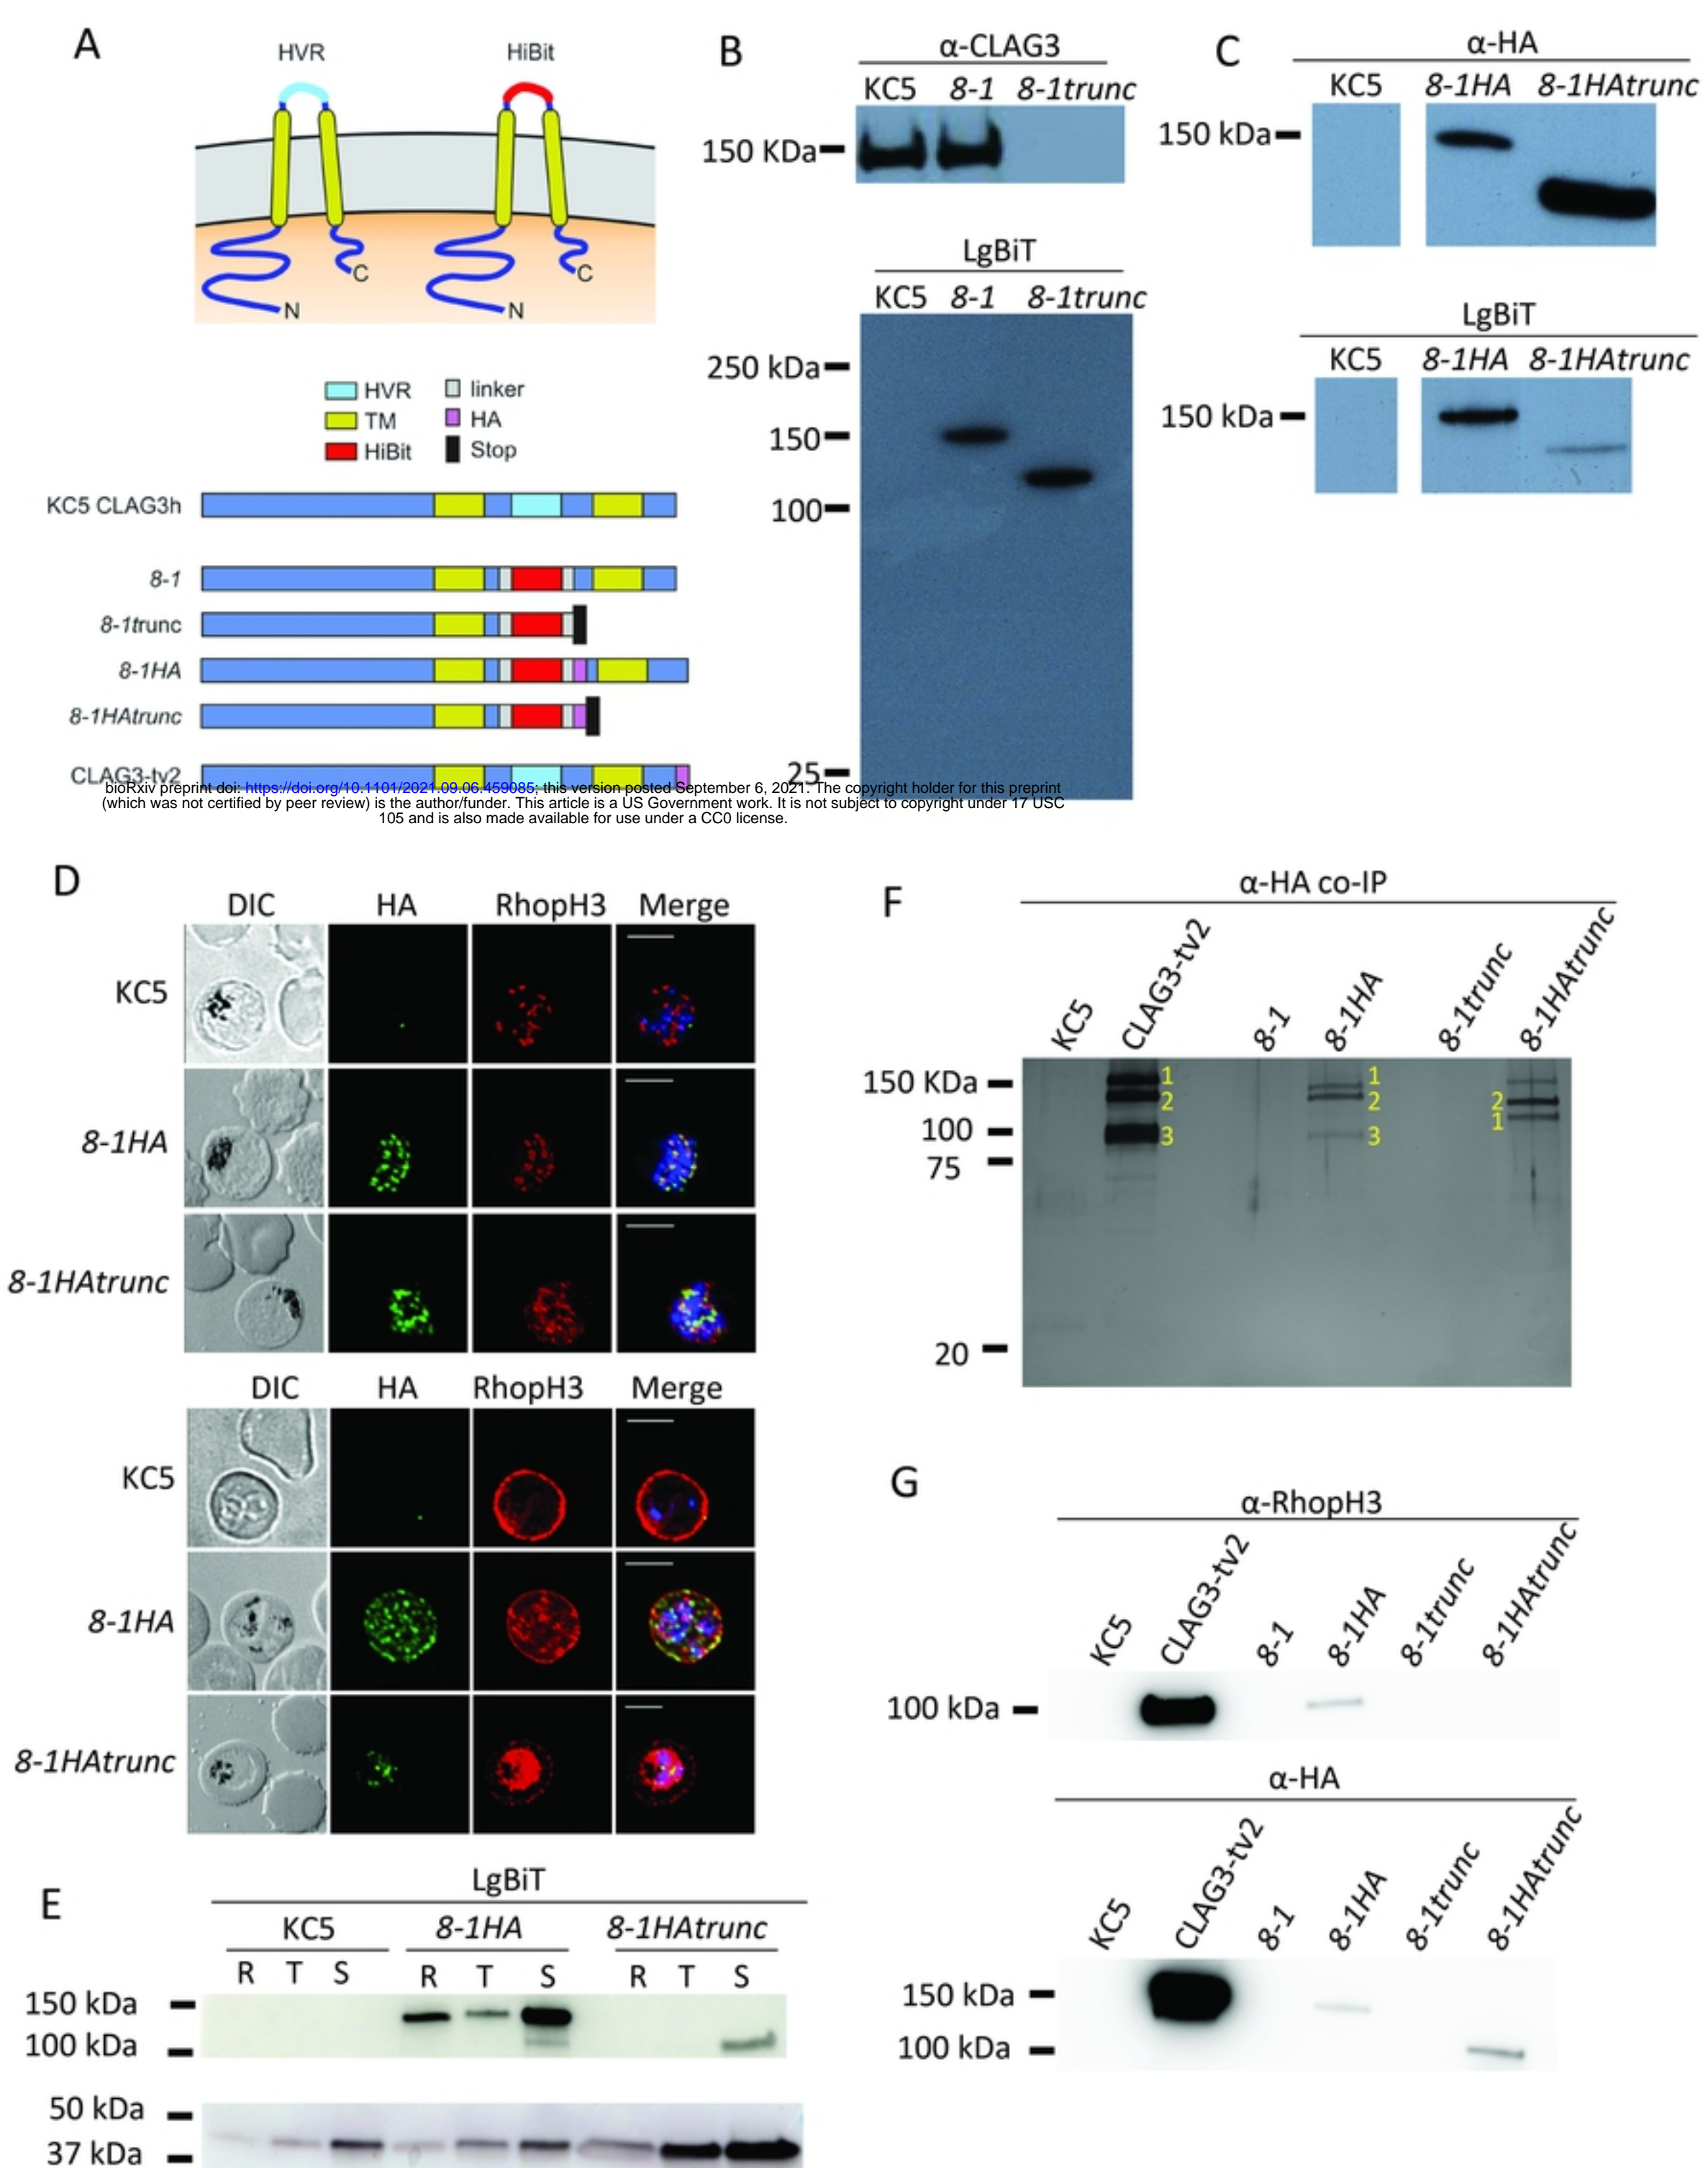

Figure 1

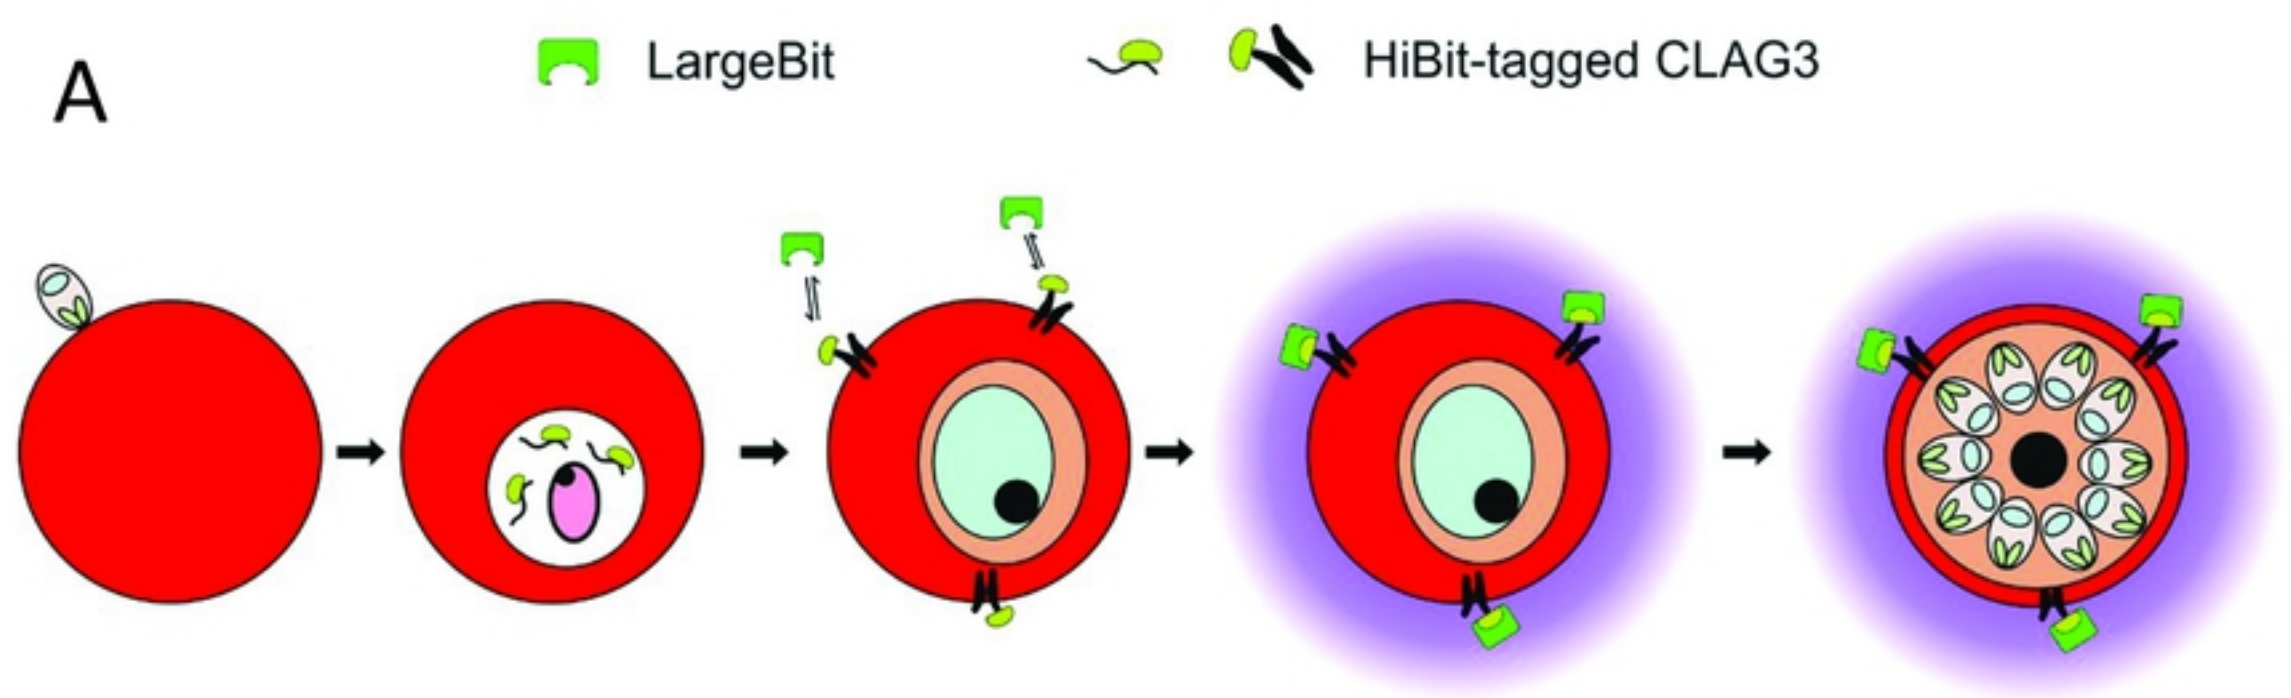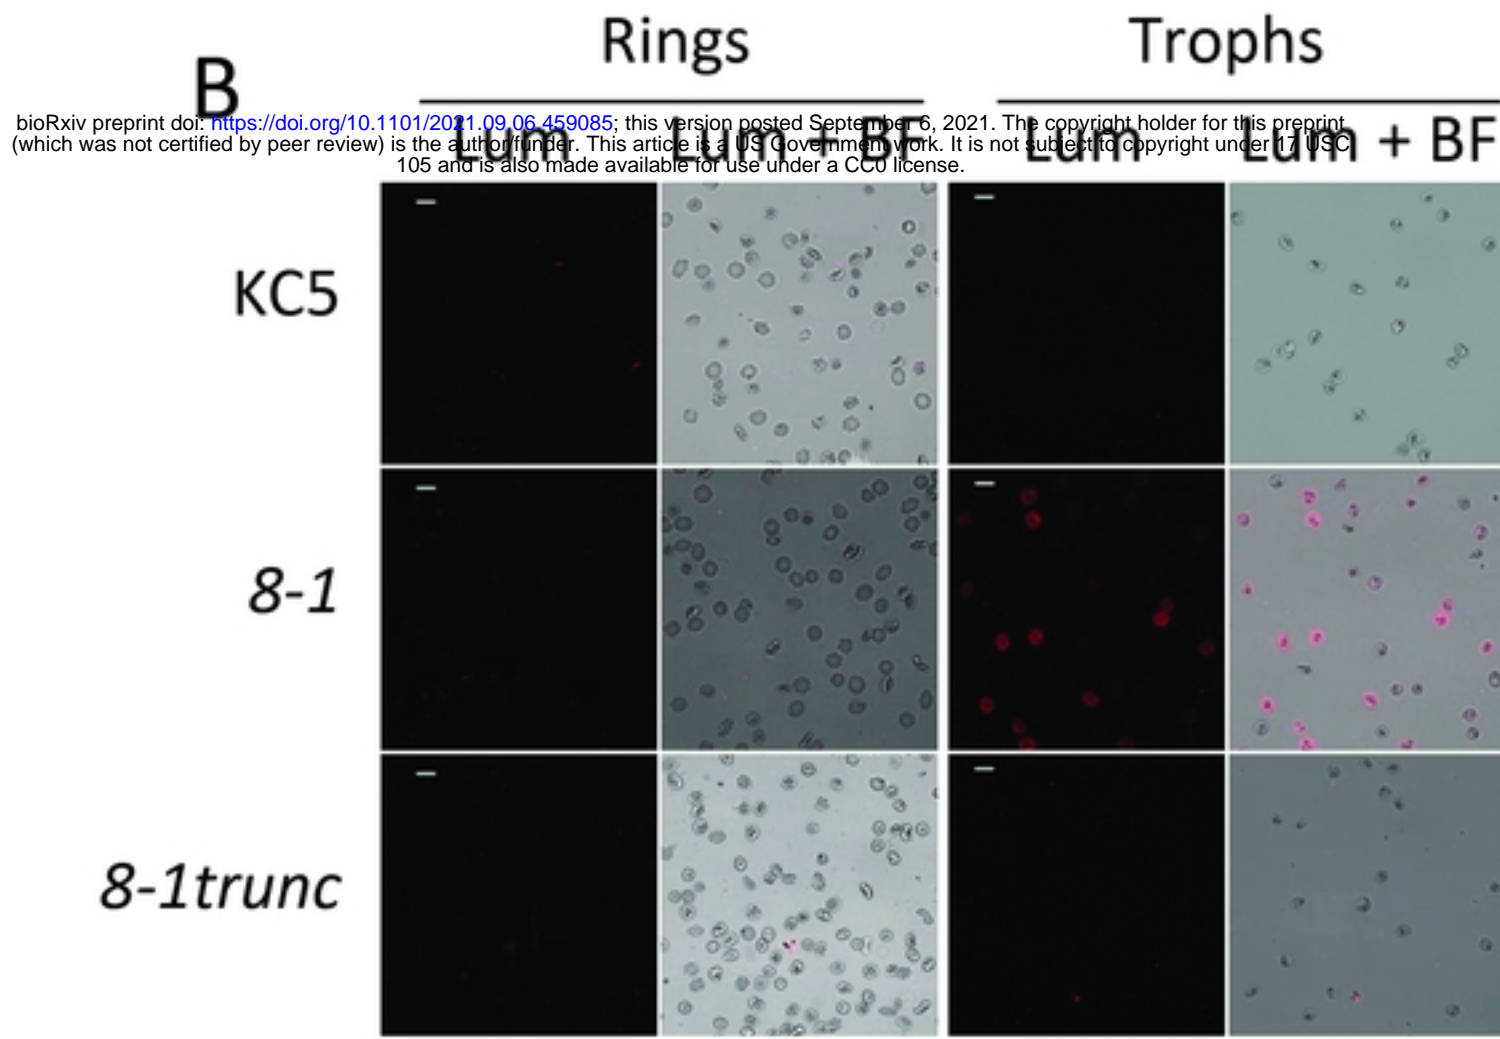

bioRxiv preprint doi: <https://doi.org/10.1101/2021.09.06.459085>; this version posted September 6, 2021. The copyright holder for this preprint (which was not certified by peer review) is the author/funder. This article is a U.S. Government work. It is not subject to copyright under 17 USC 105 and is also made available for use under a CC0 license.

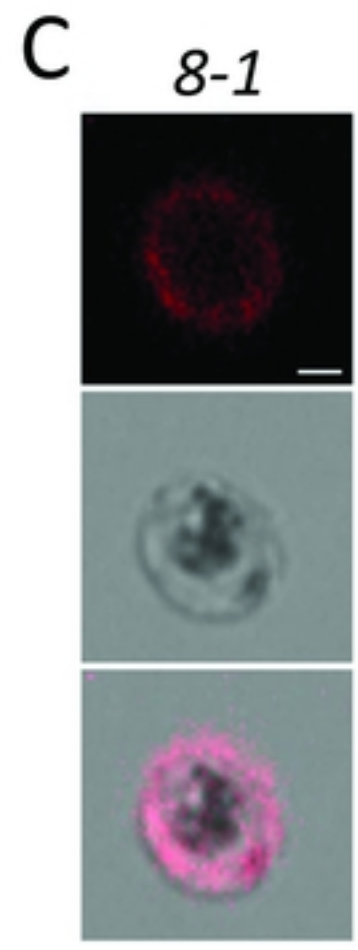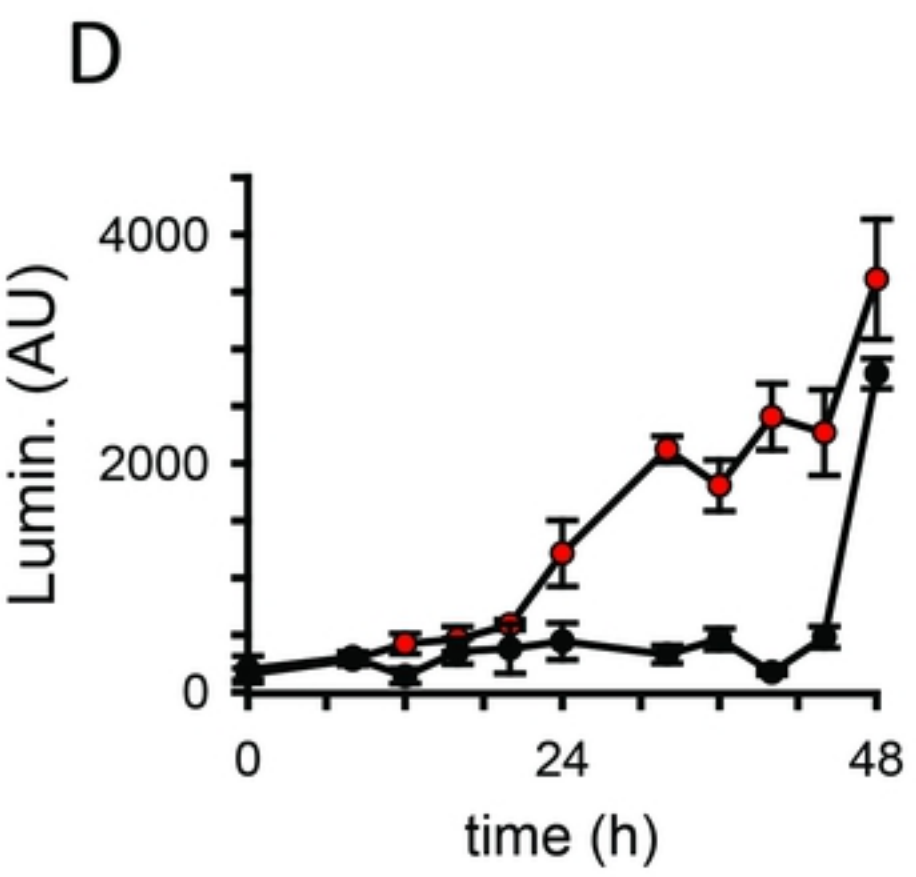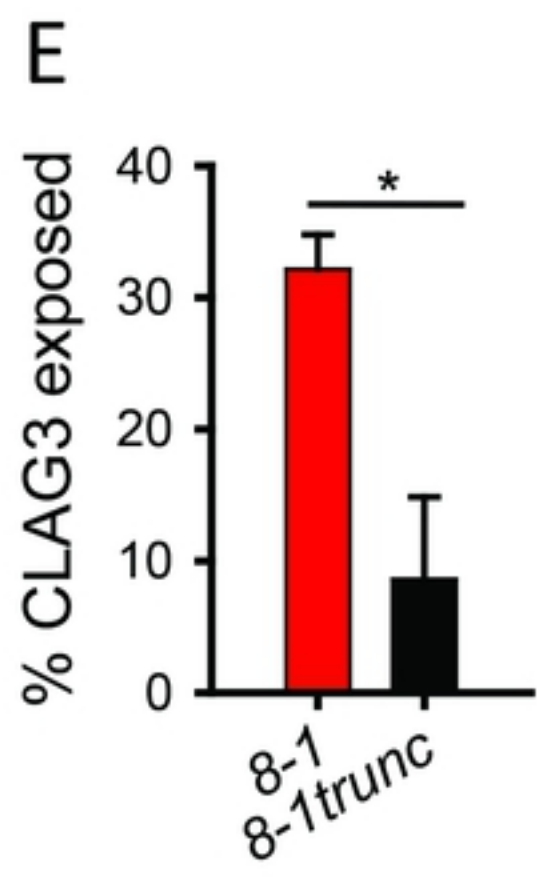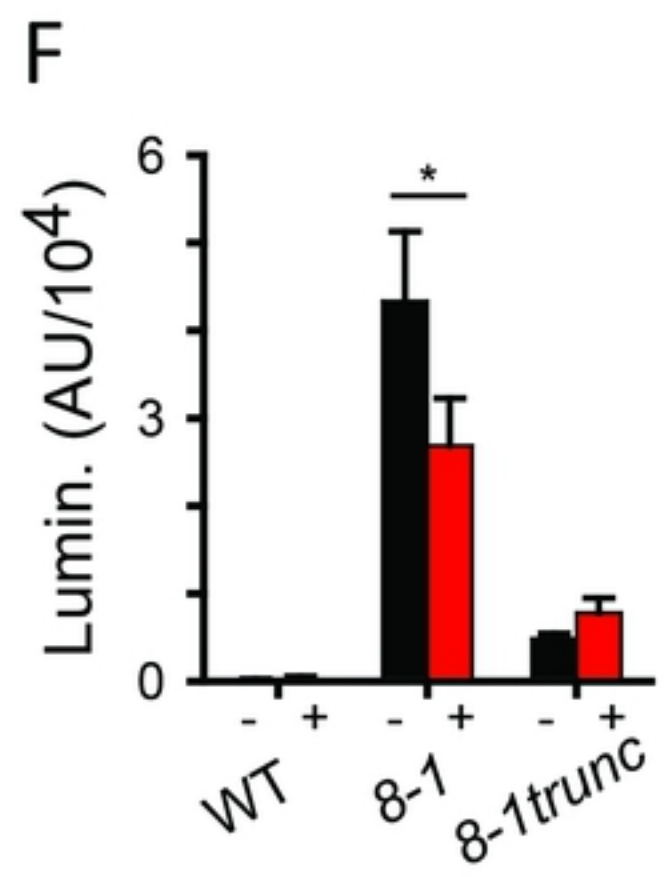

Figure 2



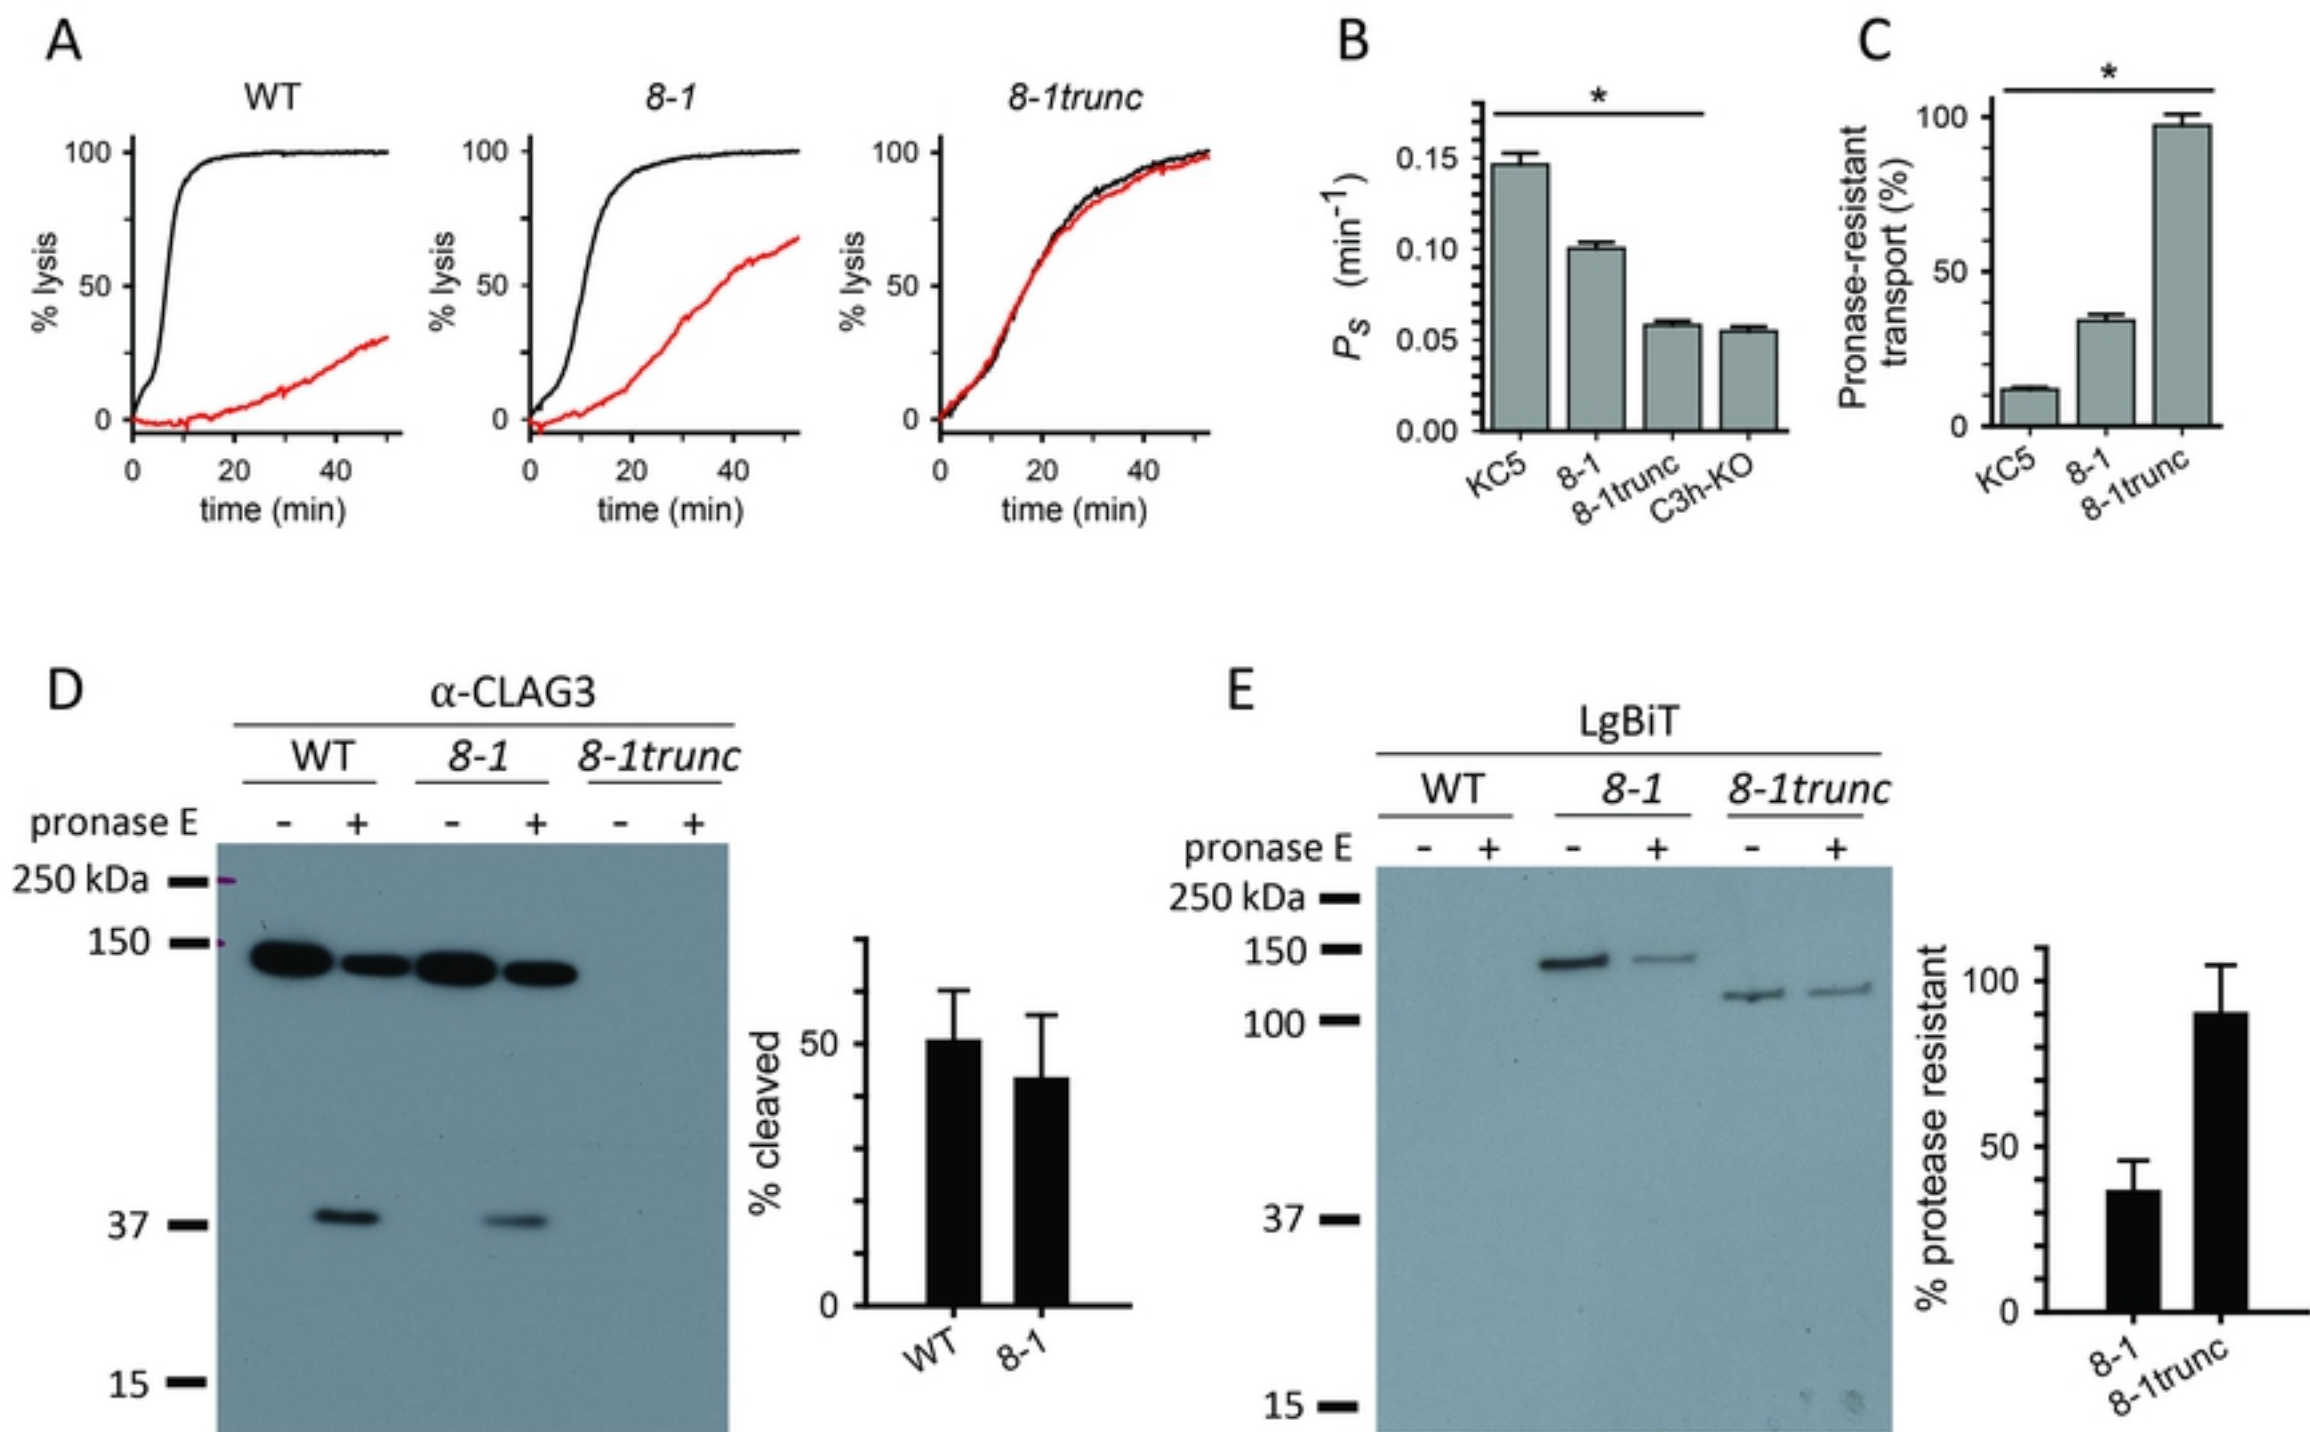

Figure 3

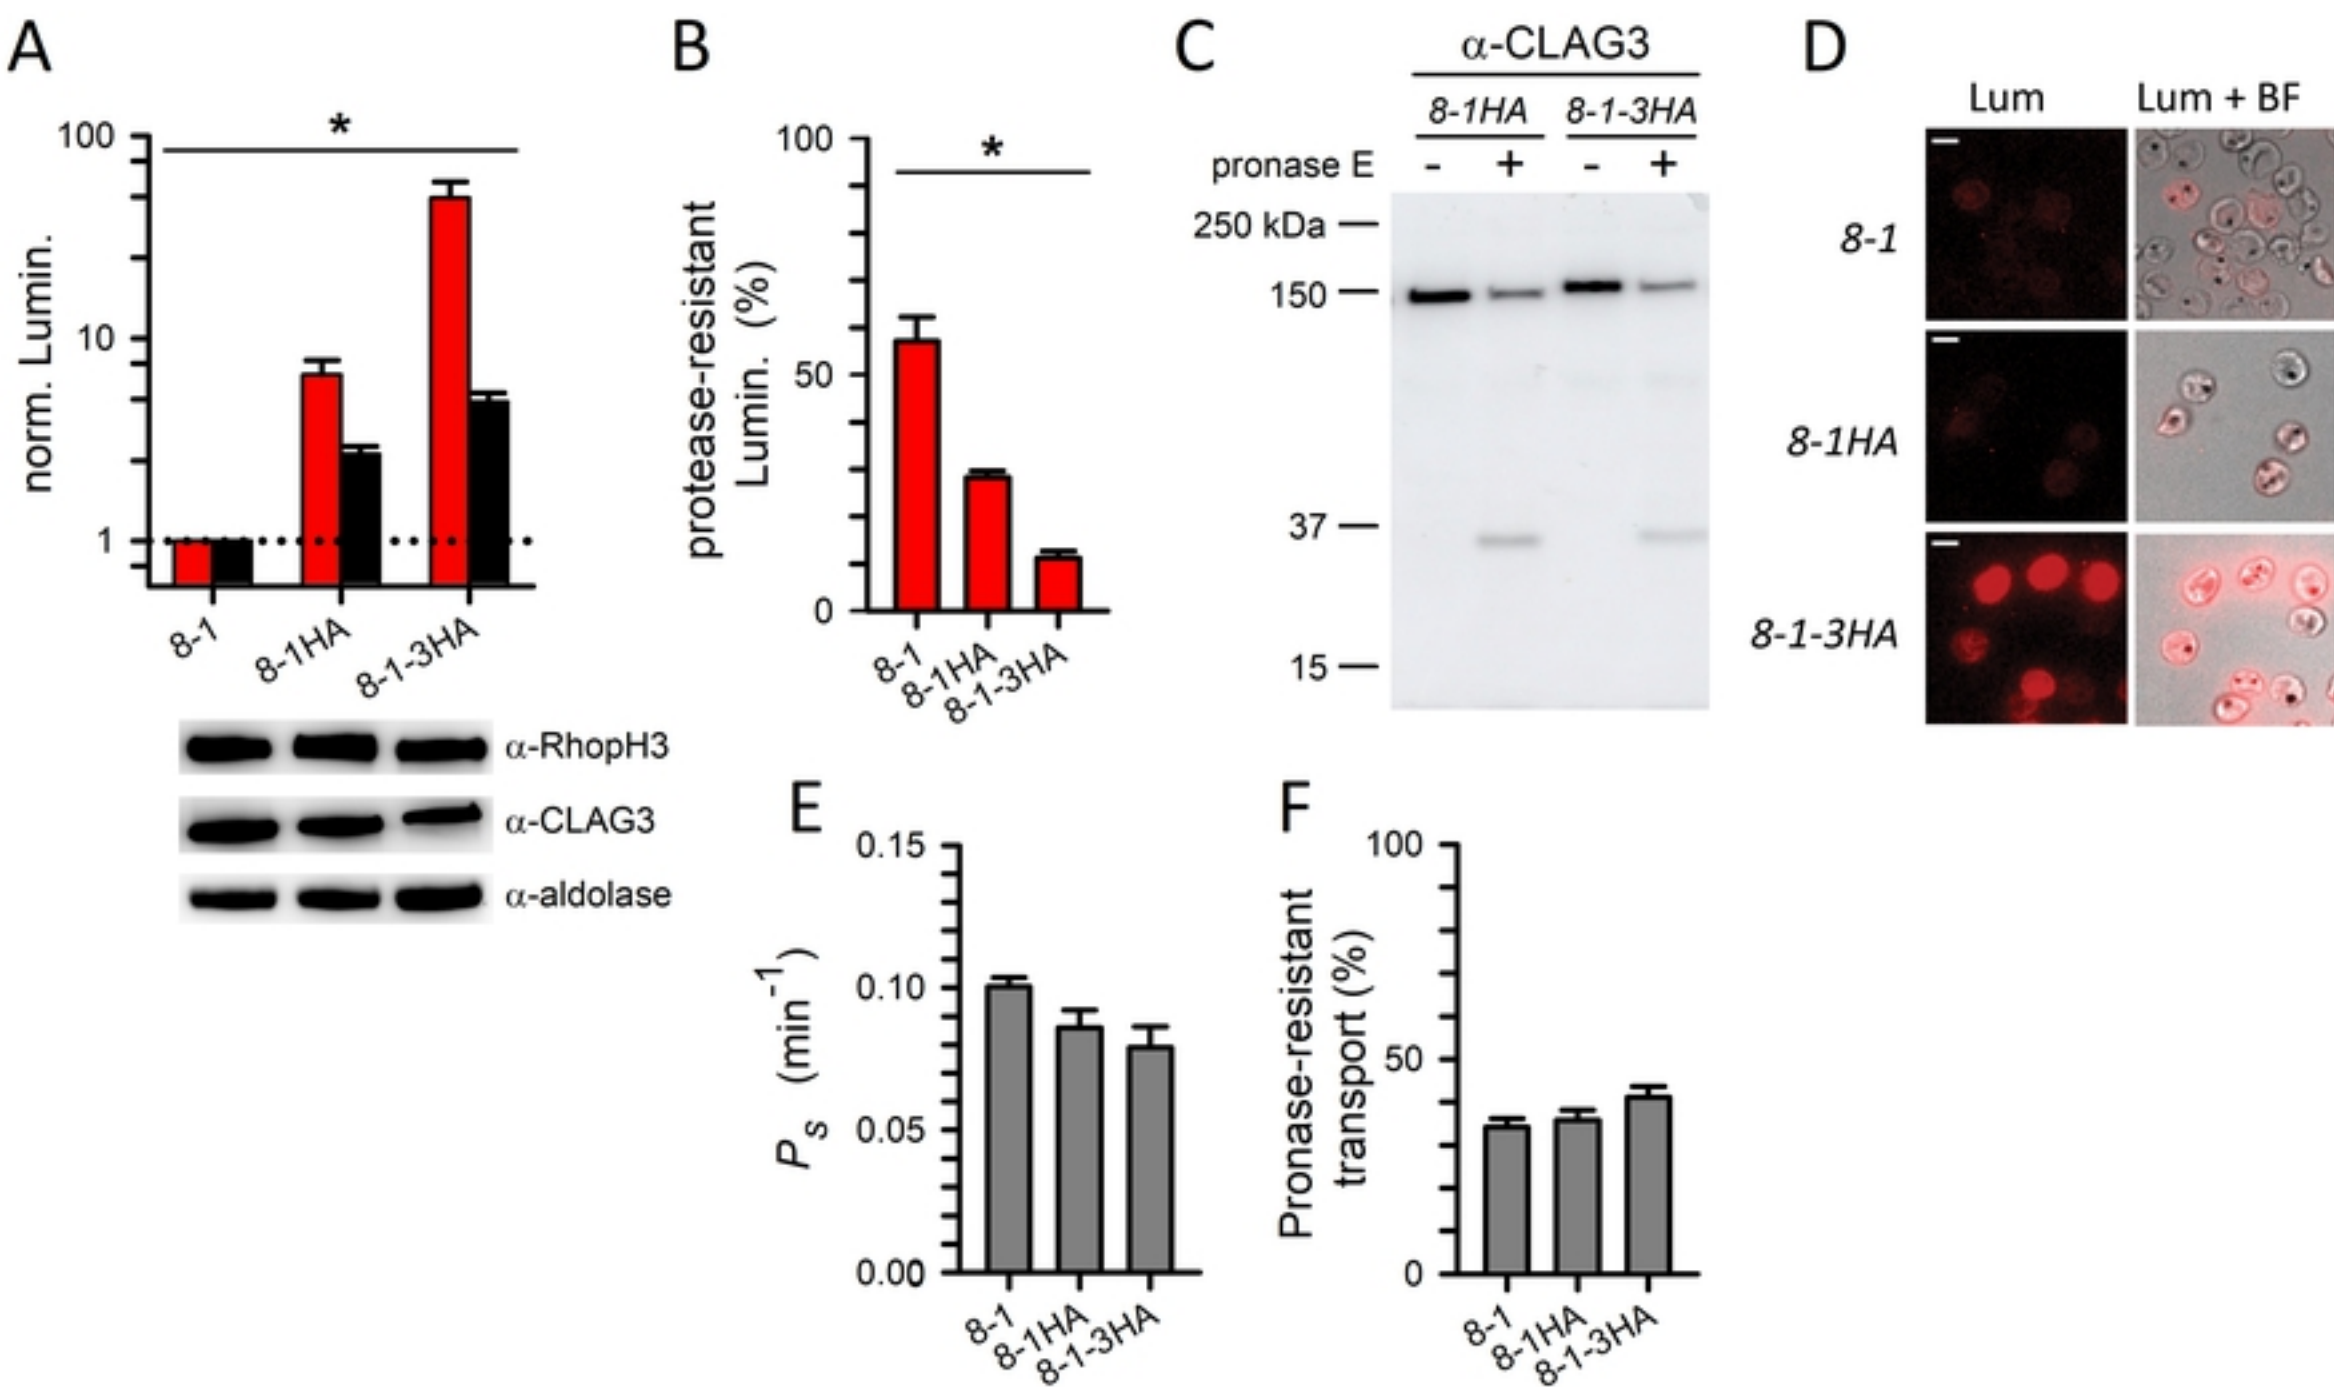

Figure 4

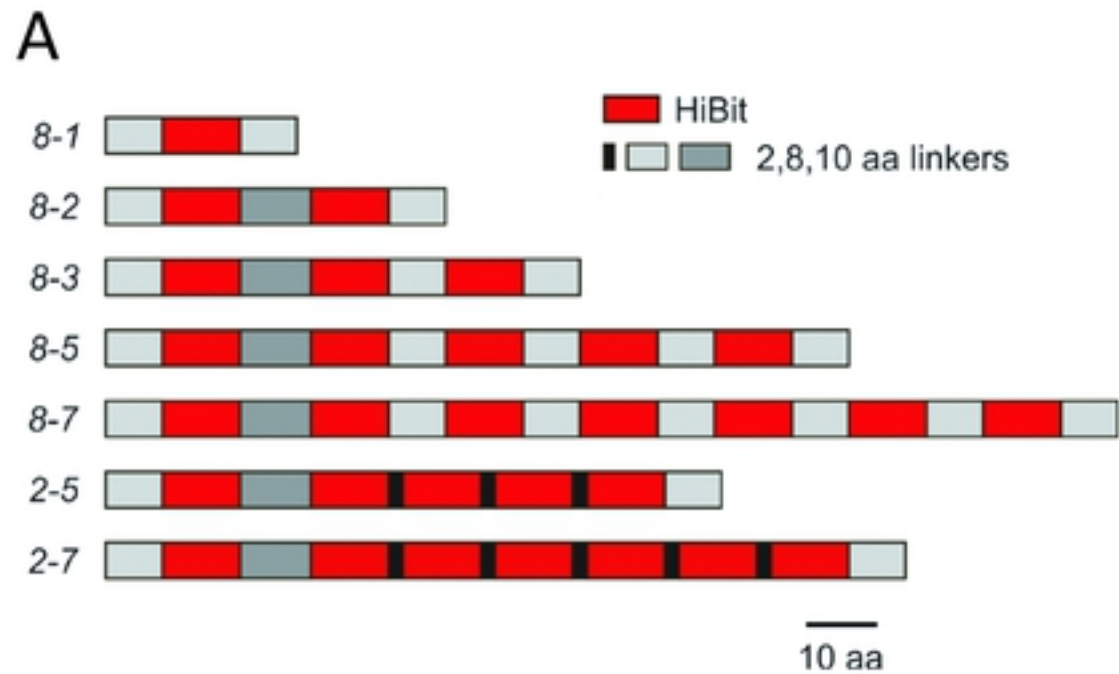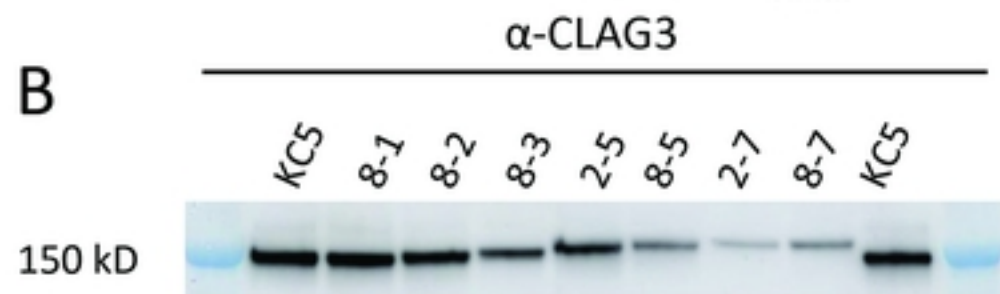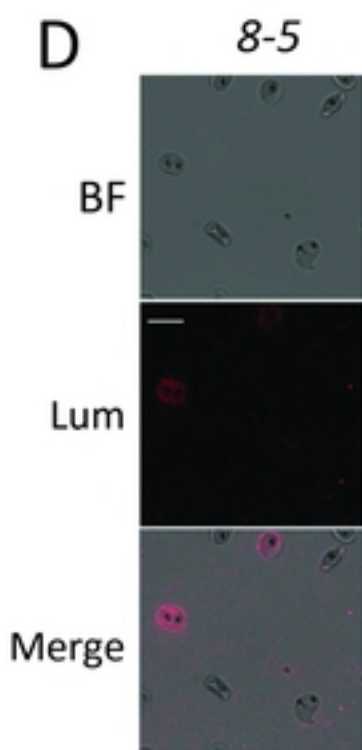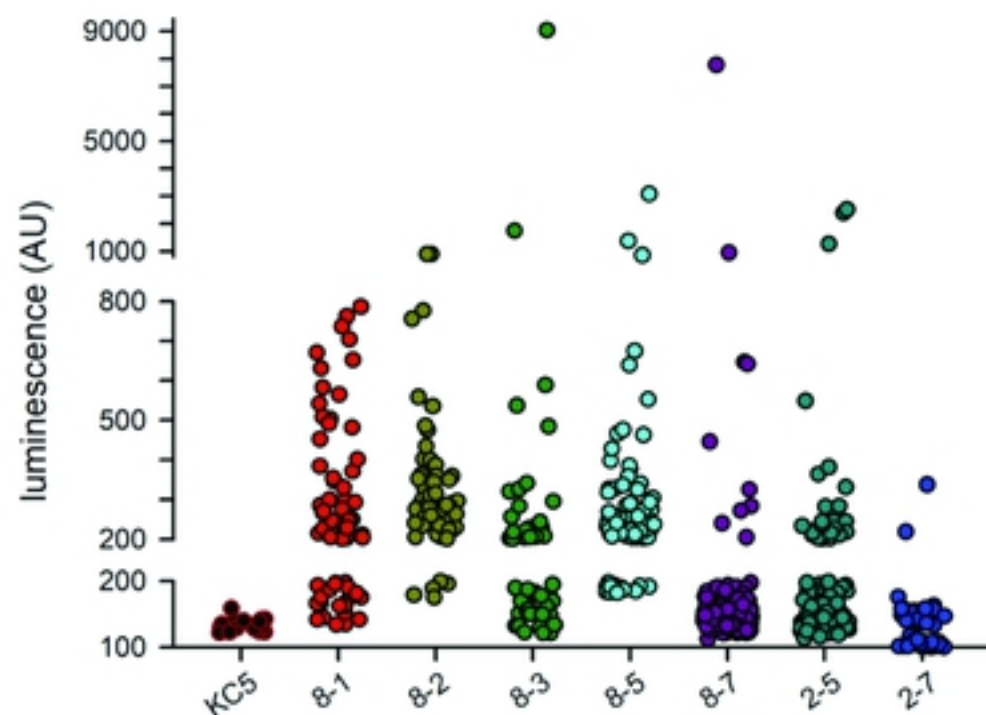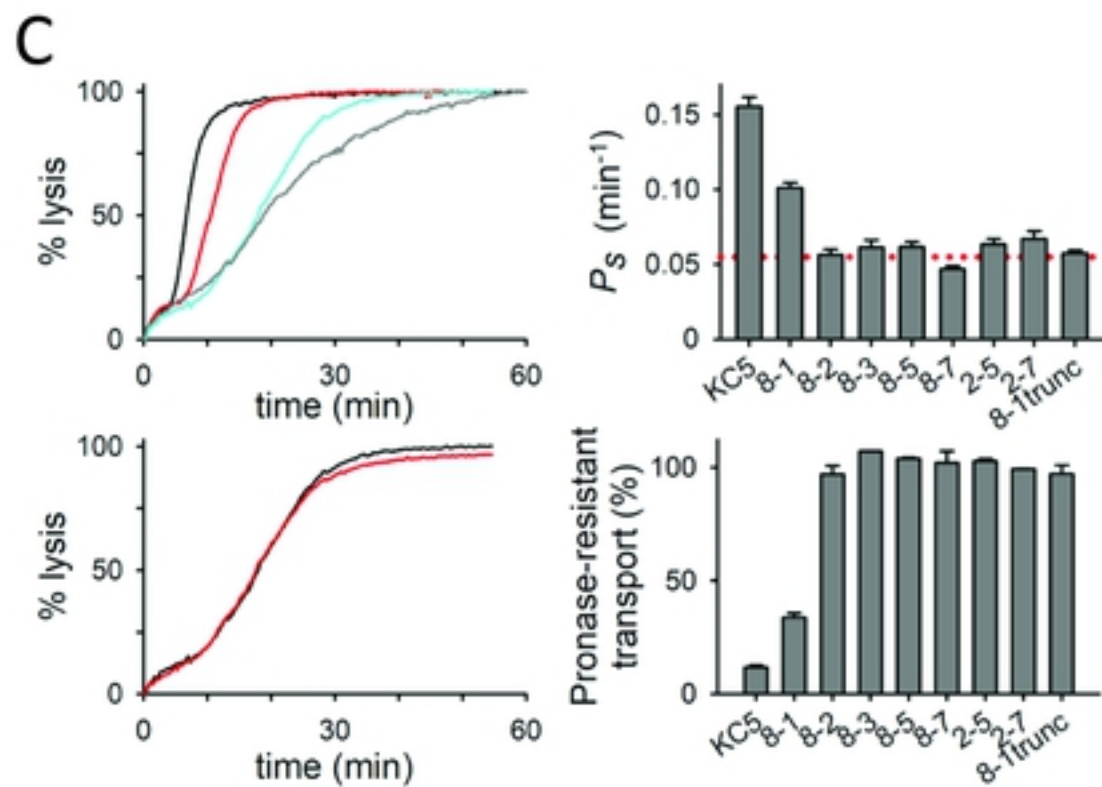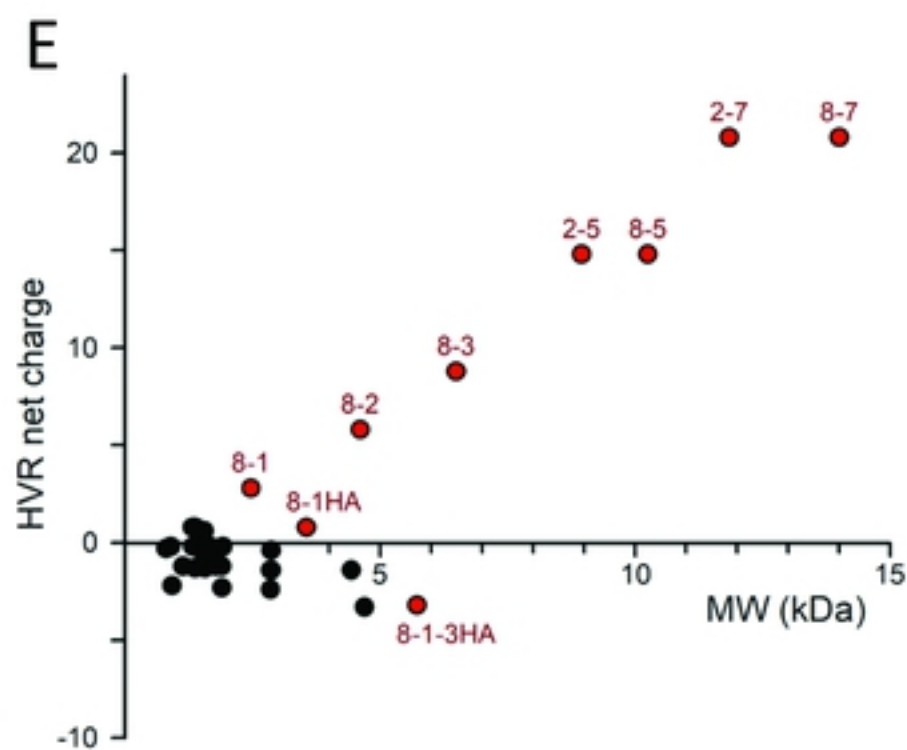

Figure 5
